# Supplementary material for: [Retracted] Recognition of Key Genes in Human Anaplastic Thyroid Cancer via the Weighing Gene Coexpression Network
Source: Hindawi journal article supplement (doi:10.1155/2022/2244228), 2022-01-01
Supplement: f1 [file 2244228.f1.doc]

| **Supplementary Table 1 Microarray data identified a total of 1063 genes as differentially expressed genes (DEG)** | | | | | | | |
| --- | --- | --- | --- | --- | --- | --- | --- |
| ID_REF | Gene | logFC | AveExpr | t | P.Value | adj.P.Val | B |
| 206457_s_at | DIO1 | -6.397064713 | 9.806274528 | -16.38728191 | 1.26759E-27 | 9.62579E-25 | 52.43221049 |
| 210342_s_at | TPO | -6.281061365 | 10.85818153 | -18.94691037 | 9.89893E-32 | 5.41224E-28 | 61.74515729 |
| 239006_at | SLC26A7 | -6.159484327 | 10.51087573 | -15.00066763 | 2.99923E-25 | 1.02489E-22 | 47.03210013 |
| 210055_at | TSHR | -5.900825894 | 10.08145164 | -15.40075059 | 6.04098E-26 | 2.68743E-23 | 48.61612955 |
| 203673_at | TG | -5.444473949 | 12.74942995 | -12.7221105 | 4.03855E-21 | 3.69298E-19 | 37.61886788 |
| 209292_at | ID4 | -5.422011076 | 9.935800407 | -15.1021334 | 1.9938E-25 | 7.41573E-23 | 47.43581518 |
| 227174_at | WDR72 | -5.373878732 | 9.644422243 | -16.0138453 | 5.39367E-27 | 3.38964E-24 | 51.0027279 |
| 206529_x_at | SLC26A4 | -5.277457163 | 9.710524144 | -14.99186639 | 3.10755E-25 | 1.0488E-22 | 46.99701795 |
| 215442_s_at | TSHR | -5.267982125 | 8.967158639 | -14.55682559 | 1.81705E-24 | 4.86996E-22 | 45.2503215 |
| 204623_at | TFF3 | -5.253026758 | 10.65825692 | -19.61988636 | 9.38987E-33 | 8.55652E-29 | 64.05725236 |
| 223623_at | C2orf40 | -5.246998663 | 9.934905931 | -14.65673526 | 1.20868E-24 | 3.42407E-22 | 45.65364126 |
| 219564_at | KCNJ16 | -5.227267581 | 10.42546712 | -12.88180311 | 2.03204E-21 | 1.99464E-19 | 38.29951378 |
| 204475_at | MMP1 | 5.211052279 | 4.92235831 | 16.36334055 | 1.39017E-27 | 1.01344E-24 | 52.34111362 |
| 1557107_at | SLC26A4-AS1 | -5.205062711 | 8.359347292 | -17.44437528 | 2.31283E-29 | 3.71924E-26 | 56.37998996 |
| 201131_s_at | CDH1 | -5.061878067 | 10.67019967 | -11.46625585 | 9.8723E-19 | 4.5627E-17 | 32.16750155 |
| 231070_at | IYD | -5.05131089 | 9.323620359 | -13.11983923 | 7.33994E-22 | 8.18603E-20 | 39.30847007 |
| 206912_at | FOXE1 | -5.012552627 | 9.471186692 | -15.40055074 | 6.04579E-26 | 2.68743E-23 | 48.61534355 |
| 1555778_a_at | POSTN | 4.995223505 | 6.792415417 | 18.85534949 | 1.36945E-31 | 6.23955E-28 | 61.42630648 |
| 219529_at | CLIC3 | -4.956325712 | 10.30350938 | -16.3824837 | 1.29125E-27 | 9.67115E-25 | 52.41395932 |
| 229177_at | C16orf89 | -4.840950701 | 9.947619936 | -16.71995942 | 3.54143E-28 | 3.5205E-25 | 53.6902897 |
| 205413_at | MPPED2 | -4.828328923 | 8.622444503 | -16.55559116 | 6.63804E-28 | 5.94975E-25 | 53.07050962 |
| 229778_at | SPX | -4.720825738 | 7.47331157 | -15.86576171 | 9.62506E-27 | 5.42526E-24 | 50.4308075 |
| 219727_at | DUOX2 | -4.698321422 | 8.537590045 | -15.9589245 | 6.68383E-27 | 4.10605E-24 | 50.79095191 |
| 230863_at | LRP2 | -4.694362606 | 8.456549874 | -17.01163527 | 1.17115E-28 | 1.44802E-25 | 54.7814401 |
| 228979_at | SFTA3 | -4.686640228 | 9.180756272 | -10.90219094 | 1.22775E-17 | 4.31963E-16 | 29.66814242 |
| 215443_at | TSHR | -4.678313758 | 9.14753881 | -13.88507057 | 2.91058E-23 | 5.34013E-21 | 42.50511676 |
| 226228_at | AQP4 | -4.655319608 | 7.697888415 | -13.34133368 | 2.86288E-22 | 3.61497E-20 | 40.24117319 |
| 1554789_a_at | PDE8B | -4.649018741 | 8.636171071 | -13.27452575 | 3.80072E-22 | 4.62816E-20 | 39.96047783 |
| 230673_at | PKHD1L1 | -4.646097926 | 7.581419176 | -13.40690588 | 2.16892E-22 | 2.85062E-20 | 40.51614394 |
| 213338_at | TMEM158 | 4.607125042 | 7.020827714 | 14.19777043 | 7.94663E-24 | 1.72413E-21 | 43.79020708 |
| 201839_s_at | EPCAM | -4.557808353 | 10.84733231 | -11.546101 | 6.92598E-19 | 3.33726E-17 | 32.51895444 |
| 211276_at | TCEAL2 | -4.522800216 | 8.590916183 | -17.99673937 | 3.01693E-30 | 6.87294E-27 | 58.38548522 |
| 221796_at | NTRK2 | -4.517444378 | 9.947707147 | -12.4955324 | 1.07555E-20 | 8.60988E-19 | 36.64806462 |
| 222608_s_at | ANLN | 4.491987638 | 5.139031757 | 13.98614004 | 1.91062E-23 | 3.77122E-21 | 42.92184105 |
| 242881_x_at | BC017398 /// CTD-2314B22.3 /// DQ786293 /// DUXAP10 /// LL22NC03-N64E9.1 | 4.455087296 | 4.685194905 | 18.68454217 | 2.51569E-31 | 8.59658E-28 | 60.82871818 |
| 214974_x_at | CXCL5 | 4.440870633 | 4.321262348 | 11.33001311 | 1.81005E-18 | 7.79248E-17 | 31.56641445 |
| 209278_s_at | TFPI2 | 4.43325359 | 5.541925687 | 12.04217446 | 7.76664E-20 | 4.83646E-18 | 34.68830149 |
| 213228_at | PDE8B | -4.432810391 | 9.656127538 | -12.8100162 | 2.76609E-21 | 2.64398E-19 | 37.99391186 |
| 235561_at | TXNL1 | -4.393936635 | 7.873273418 | -17.7155079 | 8.4704E-30 | 1.64341E-26 | 57.36927463 |
| 227803_at | ENPP5 | -4.354960918 | 8.614125997 | -12.65815964 | 5.32155E-21 | 4.64471E-19 | 37.34546048 |
| 209291_at | ID4 | -4.334940858 | 11.59708321 | -13.76998937 | 4.70757E-23 | 8.09391E-21 | 42.02904493 |
| 208650_s_at | CD24 | -4.326193399 | 10.58383472 | -11.81629817 | 2.09684E-19 | 1.15105E-17 | 33.70364362 |
| 210809_s_at | POSTN | 4.307197828 | 9.053839899 | 16.84897487 | 2.1679E-28 | 2.32412E-25 | 54.17429759 |
| 219836_at | ZBED2 | -4.264035593 | 9.334496417 | -13.44429632 | 1.85183E-22 | 2.50615E-20 | 40.67269997 |
| 215646_s_at | VCAN | 4.261018187 | 6.569845584 | 17.75045306 | 7.44672E-30 | 1.50796E-26 | 57.49609486 |
| 226777_at | ADAM12 | 4.258914193 | 5.348108051 | 18.81655281 | 1.57182E-31 | 6.61071E-28 | 61.29088908 |
| 232424_at | PRDM16 | -4.2585268 | 7.312496331 | -17.62085026 | 1.20159E-29 | 2.11926E-26 | 57.02496651 |
| 229273_at | SALL1 | -4.253105969 | 8.187993286 | -12.94907862 | 1.52282E-21 | 1.56211E-19 | 38.58535761 |
| 223075_s_at | AIF1L | -4.227424989 | 9.469559083 | -17.04818281 | 1.02029E-28 | 1.32383E-25 | 54.91738392 |
| 202311_s_at | COL1A1 | 4.204773781 | 6.795908807 | 17.00700953 | 1.19178E-28 | 1.44802E-25 | 54.76422163 |
| 208025_s_at | HMGA2 | 4.200710181 | 5.661507835 | 11.41086641 | 1.26288E-18 | 5.66894E-17 | 31.92333893 |
| 206026_s_at | TNFAIP6 | 4.195928383 | 5.491107584 | 18.90891497 | 1.13248E-31 | 5.62893E-28 | 61.61296795 |
| 224367_at | BEX2 | -4.192083187 | 9.903965354 | -15.03926899 | 2.56732E-25 | 9.05602E-23 | 47.18584723 |
| 230782_at | SORD | -4.178846221 | 7.981928659 | -18.62961119 | 3.06136E-31 | 9.84341E-28 | 60.63576682 |
| 203961_at | NEBL | -4.159243902 | 9.759513419 | -13.89218849 | 2.82544E-23 | 5.23665E-21 | 42.53450742 |
| 220161_s_at | EPB41L4B | -4.155753244 | 9.98404491 | -14.62903671 | 1.35314E-24 | 3.73651E-22 | 45.54195649 |
| 203240_at | FCGBP | -4.154073861 | 10.67523617 | -14.4722269 | 2.56873E-24 | 6.62477E-22 | 44.90779702 |
| 37512_at | HSD17B6 | -4.148376381 | 8.360089046 | -12.00878584 | 8.99181E-20 | 5.4686E-18 | 34.54308775 |
| 209875_s_at | SPP1 | 4.134932225 | 8.154948937 | 8.646311261 | 3.57683E-13 | 5.0351E-12 | 19.48168442 |
| 209469_at | GPM6A | -4.129109061 | 7.579905478 | -16.40834259 | 1.1688E-27 | 9.00059E-25 | 52.51228433 |
| 203962_s_at | NEBL | -4.10265273 | 9.404428856 | -13.59900499 | 9.64625E-23 | 1.45693E-20 | 41.31863336 |
| 266_s_at | CD24 | -4.096291851 | 11.17578493 | -11.32826139 | 1.82423E-18 | 7.83504E-17 | 31.55867489 |
| 204580_at | MMP12 | 4.063921717 | 5.425057537 | 10.7034022 | 3.00393E-17 | 9.67826E-16 | 28.78096209 |
| 218332_at | BEX1 | -4.057578979 | 9.486517279 | -15.91293269 | 8.00115E-27 | 4.65386E-24 | 50.61330144 |
| 225728_at | SORBS2 | -4.05456389 | 10.87762693 | -14.81614507 | 6.32336E-25 | 1.92072E-22 | 46.29446472 |
| 209470_s_at | GPM6A | -4.053858457 | 7.211518823 | -16.45635174 | 9.71631E-28 | 7.81234E-25 | 52.69460058 |
| 37892_at | COL11A1 | 4.041931778 | 4.395349338 | 12.67667495 | 4.91279E-21 | 4.35343E-19 | 37.4246672 |
| 225681_at | CTHRC1 | 4.018274746 | 8.672018214 | 20.04176755 | 2.20287E-33 | 3.01105E-29 | 65.47882492 |
| 221795_at | NTRK2 | -4.005414497 | 9.33671082 | -12.15634319 | 4.71087E-20 | 3.18377E-18 | 35.18394484 |
| 227238_at | MUC15 | -3.984889016 | 9.232206394 | -10.91102792 | 1.17996E-17 | 4.15684E-16 | 29.70750905 |
| 226933_s_at | ID4 | -3.977111284 | 8.919035394 | -15.54857429 | 3.35912E-26 | 1.61105E-23 | 49.19608439 |
| 213285_at | TMEM30B | -3.972120119 | 9.824984079 | -13.27512601 | 3.79104E-22 | 4.62668E-20 | 39.96300227 |
| 202859_x_at | CXCL8 | 3.971152575 | 6.581943825 | 11.41668614 | 1.2306E-18 | 5.53772E-17 | 31.94900651 |
| 205499_at | SRPX2 | 3.970149903 | 5.62477625 | 20.93096593 | 1.10743E-34 | 3.02743E-30 | 68.40652082 |
| 205710_at | LRP2 | -3.952414171 | 8.676445497 | -16.07282159 | 4.28599E-27 | 2.75034E-24 | 51.22970078 |
| 216379_x_at | CD24 | -3.90947624 | 12.52654519 | -11.32067936 | 1.88692E-18 | 8.0789E-17 | 31.52517209 |
| 214702_at | FN1 | 3.902803504 | 4.198405849 | 14.91759799 | 4.19382E-25 | 1.34881E-22 | 46.70057702 |
| 232458_at | COL3A1 | 3.897652578 | 6.423996599 | 14.63016109 | 1.34695E-24 | 3.73651E-22 | 45.54649209 |
| 203434_s_at | MME | 3.897612736 | 4.9350215 | 13.87450507 | 3.04173E-23 | 5.56209E-21 | 42.46147886 |
| 204288_s_at | SORBS2 | -3.892374435 | 10.64588837 | -15.57892015 | 2.97887E-26 | 1.49422E-23 | 49.31478458 |
| 214598_at | CLDN8 | -3.881354354 | 7.911197042 | -14.49071879 | 2.38133E-24 | 6.22963E-22 | 44.9827465 |
| 211571_s_at | VCAN | 3.87704874 | 7.02571222 | 17.41294858 | 2.59994E-29 | 4.06148E-26 | 56.26471281 |
| 205700_at | HSD17B6 | -3.87033258 | 8.549907147 | -11.83949704 | 1.89304E-19 | 1.05614E-17 | 33.80501781 |
| 203638_s_at | FGFR2 | -3.867385015 | 8.850798151 | -14.14143732 | 1.00314E-23 | 2.09338E-21 | 43.55961941 |
| 219918_s_at | ASPM | 3.847100233 | 5.418344746 | 11.01991186 | 7.23851E-18 | 2.69595E-16 | 30.19203729 |
| 206893_at | SALL1 | -3.842815056 | 7.675451966 | -12.90464943 | 1.8423E-21 | 1.83142E-19 | 38.3966446 |
| 227492_at | OCLN | -3.833708365 | 9.459531911 | -13.38549355 | 2.37458E-22 | 3.08386E-20 | 40.42641158 |
| 237058_x_at | SLC6A13 | -3.8299981 | 7.803437017 | -15.36628486 | 6.9296E-26 | 2.98327E-23 | 48.48049783 |
| 205350_at | CRABP1 | -3.825773812 | 8.44819846 | -16.79194413 | 2.69243E-28 | 2.83094E-25 | 53.96061129 |
| 209773_s_at | RRM2 | 3.818937074 | 7.021362854 | 9.047052199 | 5.69201E-14 | 9.3541E-13 | 21.30134664 |
| 209772_s_at | CD24 | -3.81022877 | 10.39192457 | -13.48349614 | 1.56933E-22 | 2.20573E-20 | 40.83664645 |
| 224650_at | MAL2 | -3.807827156 | 9.785481188 | -9.668660511 | 3.30367E-15 | 6.85757E-14 | 24.12145644 |
| 202350_s_at | LOC100506558 /// MATN2 | -3.80591627 | 10.66210718 | -11.93546915 | 1.24083E-19 | 7.2481E-18 | 34.2238064 |
| 213900_at | FAM189A2 | -3.80328898 | 8.862383683 | -16.22168125 | 2.40392E-27 | 1.64293E-24 | 51.80056303 |
| 228546_at | DPP6 | -3.801569044 | 7.558508914 | -13.95189503 | 2.20319E-23 | 4.2716E-21 | 42.78078917 |
| 205549_at | PCP4 | -3.79863448 | 9.266174493 | -11.86561258 | 1.68733E-19 | 9.51079E-18 | 33.91907117 |
| 208399_s_at | EDN3 | -3.794189947 | 6.697338523 | -13.99802177 | 1.81852E-23 | 3.60246E-21 | 42.97074588 |
| 204619_s_at | VCAN | 3.792043587 | 6.282460302 | 17.64518056 | 1.09819E-29 | 2.00146E-26 | 57.1135751 |
| 203764_at | DLGAP5 | 3.788647936 | 5.362480539 | 10.04091248 | 6.04696E-16 | 1.45326E-14 | 25.80448768 |
| 208651_x_at | CD24 | -3.781517831 | 10.90538025 | -11.56291456 | 6.42835E-19 | 3.13533E-17 | 32.59288419 |
| 209771_x_at | CD24 | -3.770002065 | 12.50402163 | -11.25255197 | 2.55686E-18 | 1.05268E-16 | 31.22390214 |
| 204424_s_at | LMO3 | -3.7674536 | 9.182928839 | -10.58413622 | 5.14585E-17 | 1.57179E-15 | 28.24725579 |
| 214735_at | IPCEF1 | -3.760434577 | 8.77521766 | -17.97003256 | 3.32629E-30 | 7.2746E-27 | 58.2894142 |
| 1570289_at | LOC646736 | -3.758789085 | 8.009101547 | -17.87014475 | 4.7958E-30 | 1.0085E-26 | 57.92929006 |
| 201890_at | RRM2 | 3.754352626 | 6.9697706 | 9.453374488 | 8.84394E-15 | 1.69962E-13 | 23.14571351 |
| 203908_at | SLC4A4 | -3.740851211 | 9.31118943 | -14.0387282 | 1.53559E-23 | 3.09809E-21 | 43.13815594 |
| 211024_s_at | NKX2-1 | -3.719283543 | 8.819184426 | -10.62681194 | 4.24383E-17 | 1.31836E-15 | 28.43834506 |
| 204620_s_at | VCAN | 3.713519001 | 8.799275032 | 18.31560606 | 9.46884E-31 | 2.58854E-27 | 59.52555989 |
| 230560_at | STXBP6 | -3.712651547 | 8.188940219 | -11.68044421 | 3.82015E-19 | 1.95752E-17 | 33.10889466 |
| 205221_at | HGD | -3.703692306 | 8.269345199 | -17.5001227 | 1.87987E-29 | 3.1146E-26 | 56.58416628 |
| 230964_at | FREM2 | -3.698979658 | 6.998063502 | -13.52322264 | 1.32722E-22 | 1.93509E-20 | 41.00260141 |
| 226907_at | PPP1R14C | -3.694823726 | 9.577800645 | -13.0418671 | 1.02385E-21 | 1.09694E-19 | 38.97871849 |
| 221731_x_at | VCAN | 3.686280247 | 8.846621382 | 17.39270143 | 2.80371E-29 | 4.25814E-26 | 56.19037633 |
| 206025_s_at | TNFAIP6 | 3.677544152 | 5.907831436 | 18.69156928 | 2.45336E-31 | 8.59658E-28 | 60.85337463 |
| 204753_s_at | HLF | -3.661469644 | 7.117478168 | -17.06701967 | 9.50353E-29 | 1.26733E-25 | 54.98738269 |
| 219949_at | LRRC2 | -3.656251878 | 7.069119557 | -13.95210355 | 2.20127E-23 | 4.2716E-21 | 42.78164847 |
| 227719_at | SMAD9 | -3.652627176 | 10.03139297 | -14.97795251 | 3.28689E-25 | 1.10252E-22 | 46.94153588 |
| 202627_s_at | SERPINE1 | 3.645066725 | 7.58534162 | 11.73903197 | 2.94872E-19 | 1.54723E-17 | 33.36561144 |
| 227566_at | LOC102725271 /// NTM | 3.644346002 | 6.258236389 | 10.49542779 | 7.68464E-17 | 2.26867E-15 | 27.84963556 |
| 228821_at | ST6GAL2 | -3.64203545 | 8.072047021 | -12.29068283 | 2.6205E-20 | 1.89019E-18 | 35.76534865 |
| 219195_at | PPARGC1A | -3.63590331 | 7.208538074 | -13.53486203 | 1.26368E-22 | 1.85233E-20 | 41.05118714 |
| 227642_at | TFCP2L1 | -3.619493306 | 7.945043428 | -15.08269512 | 2.15581E-25 | 7.91065E-23 | 47.35857799 |
| 204286_s_at | PMAIP1 | 3.614137801 | 5.851507106 | 11.13433726 | 4.33612E-18 | 1.67783E-16 | 30.70015353 |
| 205542_at | STEAP1 | 3.598516448 | 5.722319994 | 18.16401762 | 1.64014E-30 | 4.27022E-27 | 58.98517171 |
| 209955_s_at | FAP | 3.596442461 | 6.666730292 | 21.82712453 | 5.93389E-36 | 3.24436E-31 | 71.26582848 |
| 203699_s_at | DIO2 | -3.596376848 | 9.443368938 | -13.08903034 | 8.37082E-22 | 9.19025E-20 | 39.17826374 |
| 226591_at | PWAR6 | -3.595155627 | 7.615755134 | -14.66083644 | 1.18865E-24 | 3.38487E-22 | 45.67016939 |
| 235144_at | RASEF | -3.594357577 | 8.562072969 | -12.31037565 | 2.40501E-20 | 1.76266E-18 | 35.85041008 |
| 219181_at | LIPG | -3.593405649 | 9.872066979 | -13.18110685 | 5.65373E-22 | 6.591E-20 | 39.56706207 |
| 229160_at | MUM1L1 | -3.592550049 | 8.250687343 | -13.19760478 | 5.2704E-22 | 6.19697E-20 | 39.63661713 |
| 219127_at | PRR15L | -3.590431116 | 8.088812062 | -13.9185627 | 2.53128E-23 | 4.85474E-21 | 42.64335341 |
| 240236_at | STXBP5L | -3.586683405 | 6.63283609 | -15.8590595 | 9.88133E-27 | 5.51288E-24 | 50.40485441 |
| 219643_at | LRP1B | -3.563327617 | 5.858350809 | -15.52952375 | 3.62247E-26 | 1.69281E-23 | 49.12150483 |
| 204285_s_at | PMAIP1 | 3.55667234 | 6.304431635 | 11.23452339 | 2.77113E-18 | 1.13153E-16 | 31.14410689 |
| 218858_at | DEPTOR | -3.553756355 | 9.980354556 | -15.70940815 | 1.77945E-26 | 9.44574E-24 | 49.82381919 |
| 231240_at | DIO2 | -3.538922923 | 10.16287038 | -13.01438179 | 1.15149E-21 | 1.2154E-19 | 38.86230647 |
| 210078_s_at | KCNAB1 | -3.531865608 | 8.519262112 | -13.58581805 | 1.01965E-22 | 1.53158E-20 | 41.26369181 |
| 204320_at | COL11A1 | 3.529268406 | 4.53048888 | 11.78129199 | 2.4469E-19 | 1.31161E-17 | 33.55057001 |
| 225655_at | UHRF1 | 3.526592096 | 5.80134351 | 10.75163684 | 2.41701E-17 | 7.95128E-16 | 28.99650998 |
| 201563_at | SORD | -3.524501502 | 11.3286482 | -17.12003891 | 7.78373E-29 | 1.09122E-25 | 55.18415812 |
| 218542_at | CEP55 | 3.524371688 | 5.308199013 | 11.46299272 | 1.00165E-18 | 4.60986E-17 | 32.15312534 |
| 203953_s_at | CLDN3 | -3.521688558 | 8.137751054 | -12.04889331 | 7.54117E-20 | 4.72295E-18 | 34.71750881 |
| 209459_s_at | ABAT | -3.514333886 | 9.425186215 | -12.68488686 | 4.74176E-21 | 4.22929E-19 | 37.45978431 |
| 201291_s_at | TOP2A | 3.512312186 | 5.915353302 | 9.666291951 | 3.33963E-15 | 6.92169E-14 | 24.1107295 |
| 229218_at | COL1A2 | 3.511462889 | 7.117117875 | 13.97598446 | 1.99304E-23 | 3.89178E-21 | 42.88002675 |
| 233111_at | PTCSC1 | -3.510630555 | 9.326612578 | -11.1874858 | 3.41901E-18 | 1.36126E-16 | 30.93578009 |
| 228407_at | SCUBE3 | -3.510021102 | 9.279003151 | -13.9988382 | 1.81236E-23 | 3.60246E-21 | 42.97410561 |
| 228033_at | E2F7 | 3.509600663 | 4.417802618 | 13.3908902 | 2.32097E-22 | 3.0214E-20 | 40.44903257 |
| 204724_s_at | COL9A3 | -3.505130584 | 7.607064605 | -11.34606226 | 1.68515E-18 | 7.3298E-17 | 31.63731107 |
| 1552619_a_at | ANLN | 3.500304692 | 4.74900284 | 15.02977773 | 2.66733E-25 | 9.31027E-23 | 47.14806217 |
| 201292_at | TOP2A | 3.496137673 | 6.148705938 | 9.433753775 | 9.67507E-15 | 1.8496E-13 | 23.05672067 |
| 223427_s_at | EPB41L4B | -3.49438631 | 7.38859847 | -14.72032673 | 9.33045E-25 | 2.71352E-22 | 45.90967425 |
| 235141_at | MARVELD2 | -3.488136849 | 9.591868997 | -14.33388173 | 4.53349E-24 | 1.09193E-21 | 44.3456677 |
| 208228_s_at | FGFR2 | -3.478281309 | 8.096456018 | -13.29579266 | 3.47269E-22 | 4.2881E-20 | 40.0498906 |
| 212224_at | ALDH1A1 | -3.473515424 | 10.06171781 | -13.56546449 | 1.11085E-22 | 1.64151E-20 | 41.17884904 |
| 228377_at | KLHL14 | -3.469876262 | 8.718043909 | -13.17431491 | 5.81958E-22 | 6.74858E-20 | 39.53841777 |
| 204825_at | MELK | 3.466635008 | 6.55585852 | 11.89117901 | 1.50772E-19 | 8.64092E-18 | 34.03065827 |
| 211470_s_at | SULT1C2 | -3.46000621 | 7.573686299 | -12.79554558 | 2.94371E-21 | 2.79423E-19 | 37.93223603 |
| 212741_at | MAOA | -3.442193067 | 10.27807508 | -12.74793829 | 3.61322E-21 | 3.33704E-19 | 37.72915409 |
| 229178_at | PRTG | -3.436465431 | 7.623528949 | -13.90911122 | 2.63297E-23 | 4.98124E-21 | 42.60435744 |
| 203911_at | RAP1GAP | -3.433179983 | 8.713730472 | -16.49623212 | 8.33574E-28 | 7.01164E-25 | 52.8458183 |
| 212489_at | COL5A1 | 3.432596239 | 6.156576848 | 16.87860987 | 1.93736E-28 | 2.1185E-25 | 54.28516871 |
| 207447_s_at | MGAT4C | -3.428575095 | 6.654839333 | -13.62696893 | 8.57624E-23 | 1.31346E-20 | 41.43506934 |
| 225846_at | ESRP1 | -3.42716569 | 8.372818627 | -10.66397281 | 3.58858E-17 | 1.13279E-15 | 28.60463342 |
| 229782_at | RMST | -3.426535799 | 8.193146101 | -10.10337205 | 4.55091E-16 | 1.12538E-14 | 26.0862413 |
| 202628_s_at | SERPINE1 | 3.416611509 | 7.301044423 | 10.76181952 | 2.30865E-17 | 7.63615E-16 | 29.04199115 |
| 221730_at | COL5A2 | 3.411714725 | 7.553168456 | 18.34345759 | 8.56234E-31 | 2.46393E-27 | 59.6245317 |
| 209714_s_at | CDKN3 | 3.397663766 | 5.883454137 | 11.74812871 | 2.83261E-19 | 1.49714E-17 | 33.40544018 |
| 239297_at | KIAA1456 /// LOC101927137 | -3.391210595 | 7.715781828 | -14.74092387 | 8.58107E-25 | 2.53605E-22 | 45.9924899 |
| 242883_at | OTOS | -3.388657155 | 7.635874547 | -18.06510096 | 2.35081E-30 | 5.58829E-27 | 58.63098686 |
| 225726_s_at | PLEKHH1 | -3.388249113 | 9.229689812 | -13.83266995 | 3.62221E-23 | 6.45095E-21 | 42.28855156 |
| 1555758_a_at | CDKN3 | 3.385503034 | 5.830512542 | 10.91933977 | 1.13671E-17 | 4.03833E-16 | 29.7445306 |
| 201645_at | TNC | 3.376870678 | 7.60415988 | 9.095396183 | 4.56025E-14 | 7.66232E-13 | 21.52089448 |
| 204388_s_at | MAOA | -3.373197712 | 8.748699544 | -12.30531992 | 2.45858E-20 | 1.78991E-18 | 35.82857637 |
| 225285_at | BCAT1 | 3.371659266 | 7.560919139 | 13.97914741 | 1.967E-23 | 3.85468E-21 | 42.8930512 |
| 219148_at | PBK | 3.370114348 | 5.414831489 | 9.297894428 | 1.80254E-14 | 3.29061E-13 | 22.44027171 |
| 226185_at | CDS1 | -3.368770113 | 8.636413324 | -13.10227339 | 7.91094E-22 | 8.75568E-20 | 39.2342463 |
| 213106_at | ATP8A1 | -3.367469368 | 9.797791505 | -13.27246161 | 3.83417E-22 | 4.65852E-20 | 39.95179659 |
| 225911_at | NPNT | -3.351708299 | 10.326715 | -11.72232879 | 3.17451E-19 | 1.65459E-17 | 33.29245737 |
| 212464_s_at | FN1 | 3.351571934 | 10.9768721 | 15.55545334 | 3.26884E-26 | 1.60291E-23 | 49.22300294 |
| 202998_s_at | LOXL2 | 3.350333126 | 6.894036469 | 16.46535714 | 9.38565E-28 | 7.77516E-25 | 52.72876531 |
| 204437_s_at | FOLR1 | -3.348890471 | 8.434712022 | -13.52216373 | 1.33316E-22 | 1.93858E-20 | 40.99818045 |
| 211597_s_at | HOPX | -3.348663163 | 11.11487782 | -12.41033656 | 1.5568E-20 | 1.17892E-18 | 36.28151839 |
| 229963_at | BEX5 | -3.343068859 | 8.928875277 | -13.84253268 | 3.47602E-23 | 6.21083E-21 | 42.32933955 |
| 211668_s_at | PLAU | 3.339009552 | 6.157299867 | 13.70521691 | 6.17503E-23 | 1.01075E-20 | 41.76035763 |
| 205479_s_at | PLAU | 3.334124905 | 7.932709888 | 14.35993664 | 4.07275E-24 | 9.853E-22 | 44.45172392 |
| 229292_at | EPB41L5 | -3.333516095 | 7.564144152 | -13.75205031 | 5.07471E-23 | 8.67062E-21 | 41.95468343 |
| 217428_s_at | COL10A1 | 3.329076633 | 3.957889628 | 10.06084762 | 5.52241E-16 | 1.33897E-14 | 25.89443684 |
| 229802_at | WISP1 | 3.323143295 | 4.735435869 | 13.73798359 | 5.38267E-23 | 8.91811E-21 | 41.89634538 |
| 209613_s_at | ADH1B | -3.310887027 | 7.307316677 | -8.182536427 | 2.99296E-12 | 3.5466E-11 | 17.38014301 |
| 203325_s_at | COL5A1 | 3.310106529 | 7.592699334 | 16.27013761 | 1.99267E-27 | 1.39679E-24 | 51.98576122 |
| 210845_s_at | PLAUR | 3.298503447 | 7.119212907 | 15.721773 | 1.69484E-26 | 9.17481E-24 | 49.87193846 |
| 207981_s_at | ESRRG | -3.298364021 | 7.127322649 | -14.31453587 | 4.90926E-24 | 1.15199E-21 | 44.26686397 |
| 229032_at | WSCD2 | -3.290799736 | 8.468028597 | -19.28460205 | 3.01595E-32 | 2.06122E-28 | 62.91223092 |
| 218039_at | NUSAP1 | 3.288287915 | 6.745964404 | 8.869351045 | 1.28596E-13 | 1.96805E-12 | 20.49430844 |
| 205943_at | TDO2 | 3.287928295 | 5.046844274 | 9.455571031 | 8.75546E-15 | 1.68439E-13 | 23.15567568 |
| 213308_at | SHANK2 | -3.280619694 | 7.821991687 | -15.17205665 | 1.50596E-25 | 5.88129E-23 | 47.71324282 |
| 209277_at | TFPI2 | 3.274994485 | 4.322246403 | 9.971394028 | 8.29918E-16 | 1.94246E-14 | 25.49065643 |
| 214091_s_at | GPX3 | -3.273582359 | 12.02737277 | -13.31577465 | 3.19048E-22 | 3.99017E-20 | 40.13385079 |
| 205709_s_at | CDS1 | -3.266411449 | 9.079375652 | -12.79923394 | 2.89738E-21 | 2.75983E-19 | 37.94795867 |
| 202404_s_at | COL1A2 | 3.266047819 | 10.66984038 | 17.04281648 | 1.04115E-28 | 1.32383E-25 | 54.89743394 |
| 202310_s_at | COL1A1 | 3.264479367 | 9.330909485 | 13.56629377 | 1.10698E-22 | 1.64022E-20 | 41.18230684 |
| 227760_at | IGFBPL1 | -3.263087825 | 7.750490725 | -15.19670739 | 1.36431E-25 | 5.44478E-23 | 47.8108943 |
| 204298_s_at | LOX | 3.261852625 | 5.592764819 | 15.27353393 | 1.00329E-25 | 4.15568E-23 | 48.11472374 |
| 242546_at | DUXAP10 /// LINC01296 | 3.260291294 | 4.513792331 | 15.25617473 | 1.07537E-25 | 4.38777E-23 | 48.04614027 |
| 242354_at | RP11-532F12.5 | -3.253131144 | 8.516693229 | -14.27344953 | 5.81475E-24 | 1.31918E-21 | 44.09934234 |
| 203645_s_at | CD163 | 3.25221253 | 8.145399164 | 10.77707408 | 2.15537E-17 | 7.18567E-16 | 29.1101112 |
| 213943_at | TWIST1 | 3.249557845 | 5.419748202 | 19.54516577 | 1.21648E-32 | 9.50161E-29 | 63.8032523 |
| 215049_x_at | CD163 | 3.249022952 | 8.637907326 | 10.86324731 | 1.4626E-17 | 5.06445E-16 | 29.49458319 |
| 235228_at | CCDC85A | -3.245791615 | 7.158985193 | -13.8977654 | 2.7605E-23 | 5.16884E-21 | 42.55753063 |
| 219597_s_at | DUOX1 | -3.244084611 | 7.842616196 | -15.25914357 | 1.06269E-25 | 4.3686E-23 | 48.05787249 |
| 219995_s_at | ZNF750 | -3.237277984 | 6.044269052 | -14.19821588 | 7.93202E-24 | 1.72413E-21 | 43.79202884 |
| 202954_at | UBE2C | 3.235041928 | 6.631480122 | 11.29122529 | 2.15169E-18 | 9.02176E-17 | 31.39497325 |
| 203936_s_at | MMP9 | 3.233796125 | 8.178725613 | 8.136462329 | 3.6948E-12 | 4.3064E-11 | 17.1718565 |
| 209242_at | PEG3 | -3.229885639 | 7.866610636 | -12.14570307 | 4.93528E-20 | 3.31902E-18 | 35.13781184 |
| 236028_at | IBSP | 3.228772419 | 3.989819223 | 8.147322782 | 3.51584E-12 | 4.11021E-11 | 17.22094289 |
| 218792_s_at | BSPRY | -3.223847024 | 7.994313412 | -14.62923235 | 1.35206E-24 | 3.73651E-22 | 45.54274568 |
| 226374_at | CXADR | -3.223582075 | 9.687244944 | -11.96380464 | 1.09554E-19 | 6.49659E-18 | 34.34726941 |
| 231257_at | TCERG1L | -3.219508866 | 7.389238182 | -9.248776557 | 2.25751E-14 | 4.02051E-13 | 22.21731756 |
| 228370_at | IPW /// LOC101930404 /// PWARSN /// SNORD107 /// SNORD115-13 /// SNORD115-26 /// SNORD115-7 /// SNORD116-22 /// SNORD116-28 /// SNORD116-4 | -3.218375664 | 9.684066383 | -14.461756 | 2.68135E-24 | 6.88277E-22 | 44.86533784 |
| 203685_at | BCL2 | -3.214044257 | 9.499717275 | -16.07042969 | 4.3261E-27 | 2.75034E-24 | 51.22050435 |
| 223381_at | NUF2 | 3.213280667 | 4.850566416 | 10.22171423 | 2.65757E-16 | 6.94564E-15 | 26.61949685 |
| 205051_s_at | KIT | -3.211533268 | 9.332311199 | -13.82016601 | 3.81648E-23 | 6.77486E-21 | 42.23682303 |
| 226517_at | BCAT1 | 3.209188466 | 7.736795112 | 13.41109592 | 2.13083E-22 | 2.81408E-20 | 40.53369646 |
| 205363_at | BBOX1 | -3.209185257 | 6.866778071 | -12.52350174 | 9.52752E-21 | 7.77488E-19 | 36.76822087 |
| 219607_s_at | MS4A4A | 3.207339092 | 7.477524388 | 10.45473086 | 9.23861E-17 | 2.66555E-15 | 27.66703829 |
| 212012_at | PXDN | 3.206197789 | 8.095863621 | 20.10541472 | 1.7732E-33 | 3.01105E-29 | 65.6914539 |
| 218755_at | KIF20A | 3.205309487 | 5.330717724 | 12.42781257 | 1.44298E-20 | 1.10497E-18 | 36.35677376 |
| 201109_s_at | THBS1 | 3.198005714 | 6.809681426 | 11.72534013 | 3.13256E-19 | 1.63428E-17 | 33.30564803 |
| 229168_at | COL23A1 | -3.193691423 | 8.187879961 | -18.07783883 | 2.24417E-30 | 5.57728E-27 | 58.67666598 |
| 207828_s_at | CENPF | 3.190644677 | 6.603094586 | 12.18642072 | 4.13046E-20 | 2.84067E-18 | 35.31428738 |
| 210052_s_at | TPX2 | 3.187935064 | 5.830592866 | 10.53411129 | 6.45125E-17 | 1.93378E-15 | 28.02309479 |
| 242033_at | RNF180 | -3.187878228 | 6.909003407 | -13.23849655 | 4.42924E-22 | 5.28752E-20 | 39.80887365 |
| 204755_x_at | HLF | -3.186961193 | 7.131099877 | -16.46110225 | 9.54044E-28 | 7.78543E-25 | 52.71262442 |
| 222958_s_at | DEPDC1 | 3.185973803 | 5.282295495 | 11.05229509 | 6.26061E-18 | 2.34451E-16 | 30.33595102 |
| 223235_s_at | SMOC2 | -3.184936206 | 9.452322933 | -8.919633676 | 1.02109E-13 | 1.59281E-12 | 20.72266369 |
| 228285_at | TDRD9 | -3.183729587 | 6.986312832 | -10.20623133 | 2.8512E-16 | 7.4092E-15 | 26.54977524 |
| 201110_s_at | THBS1 | 3.175744975 | 6.892994329 | 10.93464529 | 1.0612E-17 | 3.7997E-16 | 29.8126878 |
| 231766_s_at | COL12A1 | 3.175056968 | 5.360057048 | 14.6529099 | 1.22767E-24 | 3.45993E-22 | 45.63822277 |
| 209355_s_at | PPAP2B | -3.171539313 | 10.91392665 | -12.75415737 | 3.51772E-21 | 3.27652E-19 | 37.75569832 |
| 203561_at | FCGR2A | 3.171268806 | 7.106910975 | 13.27793851 | 3.74605E-22 | 4.582E-20 | 39.97482985 |
| 225792_at | HOOK1 | -3.169038493 | 7.775494236 | -12.1061109 | 5.86897E-20 | 3.82462E-18 | 34.96604253 |
| 218186_at | RAB25 | -3.168595022 | 8.501430946 | -11.14791558 | 4.08062E-18 | 1.5956E-16 | 30.76037459 |
| 236451_at | LOC100996579 | -3.164343929 | 6.858847785 | -11.2536874 | 2.54394E-18 | 1.04973E-16 | 31.22892663 |
| 226311_at | ADAMTS2 | 3.160013069 | 5.692152618 | 16.5458737 | 6.88998E-28 | 6.07596E-25 | 53.0337577 |
| 209642_at | BUB1 | 3.157470067 | 5.025438825 | 9.523488634 | 6.41643E-15 | 1.26832E-13 | 23.46364491 |
| 230585_at | KCNJ15 | -3.150618392 | 8.308926143 | -10.01439455 | 6.82296E-16 | 1.62053E-14 | 25.68480477 |
| 205342_s_at | SULT1C2 | -3.147478929 | 6.947287546 | -12.44350016 | 1.34795E-20 | 1.04242E-18 | 36.42429858 |
| 214433_s_at | SELENBP1 | -3.144746936 | 9.566551484 | -13.0605223 | 9.45419E-22 | 1.03175E-19 | 39.05767962 |
| 235746_s_at | PLA2R1 | -3.13654691 | 7.533516757 | -12.99343454 | 1.25943E-21 | 1.31915E-19 | 38.77352519 |
| 218663_at | NCAPG | 3.135753555 | 4.88832688 | 10.41121176 | 1.1251E-16 | 3.18729E-15 | 27.47165665 |
| 225687_at | FAM83D | 3.135680996 | 5.433081194 | 12.50476267 | 1.03336E-20 | 8.31891E-19 | 36.68772766 |
| 204754_at | HLF | -3.132196649 | 7.070008149 | -16.36589602 | 1.37654E-27 | 1.01344E-24 | 52.35084075 |
| 221729_at | COL5A2 | 3.129709915 | 8.627094588 | 19.66202004 | 8.11664E-33 | 8.55652E-29 | 64.20018257 |
| 229073_at | PRTG | -3.126990222 | 7.392178263 | -14.20671182 | 7.65843E-24 | 1.68162E-21 | 43.82676938 |
| 222073_at | COL4A3 | -3.124848351 | 7.090849376 | -10.0482707 | 5.84777E-16 | 1.4116E-14 | 25.83769101 |
| 215933_s_at | HHEX | -3.124153453 | 9.886220057 | -13.68209165 | 6.80403E-23 | 1.08458E-20 | 41.66430241 |
| 229687_s_at | PRDM11 | -3.118029022 | 6.171728482 | -16.74252704 | 3.2496E-28 | 3.29022E-25 | 53.77510972 |
| 204602_at | DKK1 | 3.116882369 | 5.057748959 | 8.069763831 | 5.01143E-12 | 5.69765E-11 | 16.87054346 |
| 204787_at | VSIG4 | 3.11054243 | 7.697368896 | 13.26693241 | 3.92525E-22 | 4.7376E-20 | 39.92853962 |
| 206068_s_at | ACADL | -3.109022294 | 7.018976339 | -14.44782798 | 2.83892E-24 | 7.25317E-22 | 44.8088381 |
| 225817_at | CGNL1 /// LOC101930344 /// LOC101930349 | -3.102459544 | 9.198454457 | -12.20434078 | 3.81942E-20 | 2.65683E-18 | 35.39189816 |
| 210471_s_at | KCNAB1 | -3.098501139 | 8.29922091 | -13.39426333 | 2.28808E-22 | 2.9857E-20 | 40.46316978 |
| 212013_at | PXDN | 3.098238207 | 6.770737979 | 18.70057311 | 2.37577E-31 | 8.59658E-28 | 60.88495799 |
| 238805_at | C11orf52 /// HSPB2 /// HSPB2-C11orf52 | -3.096215302 | 7.527956967 | -14.87364755 | 5.00954E-25 | 1.56512E-22 | 46.52481005 |
| 230951_at | EPB41L5 | -3.094800223 | 6.323578438 | -14.38973575 | 3.6033E-24 | 8.87435E-22 | 44.57291346 |
| 207173_x_at | CDH11 | 3.091992501 | 8.065839225 | 13.55199738 | 1.17567E-22 | 1.73261E-20 | 41.12268368 |
| 215446_s_at | LOX | 3.090986355 | 7.429770172 | 16.77315081 | 2.89197E-28 | 2.98337E-25 | 53.89010254 |
| 203453_at | SCNN1A | -3.085642236 | 8.259523599 | -9.019919522 | 6.44623E-14 | 1.0477E-12 | 21.17812261 |
| 201562_s_at | SORD | -3.076923827 | 9.416985987 | -16.99602461 | 1.24227E-28 | 1.47654E-25 | 54.72332118 |
| 204709_s_at | KIF23 | 3.076703176 | 4.155147833 | 12.29243926 | 2.60052E-20 | 1.88073E-18 | 35.77293716 |
| 209591_s_at | BMP7 | -3.075708001 | 6.481368523 | -12.78338997 | 3.10176E-21 | 2.929E-19 | 37.88040815 |
| 204162_at | NDC80 | 3.072989081 | 5.376518896 | 9.636428866 | 3.82804E-15 | 7.85359E-14 | 23.97546618 |
| 227848_at | PEBP4 | -3.072454794 | 8.089568457 | -12.83433364 | 2.49154E-21 | 2.41479E-19 | 38.09750085 |
| 228955_at | LRP8 | -3.068933699 | 8.168879272 | -13.34566303 | 2.81084E-22 | 3.55747E-20 | 40.2593442 |
| 218355_at | KIF4A | 3.065226651 | 5.590635811 | 12.57178896 | 7.72991E-21 | 6.49206E-19 | 36.97545311 |
| 205259_at | NR3C2 | -3.064648405 | 8.739668176 | -12.37359059 | 1.82647E-20 | 1.36052E-18 | 36.12317096 |
| 209016_s_at | KRT7 | -3.059979669 | 10.65193133 | -8.977538238 | 7.82926E-14 | 1.25129E-12 | 20.98564322 |
| 204006_s_at | FCGR3A /// FCGR3B | 3.05933508 | 6.285164983 | 10.15254078 | 3.63909E-16 | 9.17323E-15 | 26.30789312 |
| 203700_s_at | DIO2 | -3.054641957 | 8.864962506 | -12.17600405 | 4.32285E-20 | 2.96233E-18 | 35.26915731 |
| 201506_at | TGFBI | 3.053341439 | 9.438184234 | 14.08161801 | 1.28525E-23 | 2.62205E-21 | 43.31431681 |
| 208791_at | CLU | -3.051970064 | 11.26401836 | -10.19624841 | 2.98349E-16 | 7.7236E-15 | 26.50481347 |
| 227526_at | CDON | -3.051412312 | 7.611400809 | -13.90021751 | 2.73242E-23 | 5.15155E-21 | 42.56765243 |
| 216442_x_at | FN1 | 3.046398134 | 11.33837805 | 14.87765829 | 4.9289E-25 | 1.54878E-22 | 46.54086031 |
| 210495_x_at | FN1 | 3.044553005 | 11.33878678 | 14.99824493 | 3.02866E-25 | 1.02852E-22 | 47.02244412 |
| 201348_at | GPX3 | -3.043098978 | 12.52370407 | -12.49290023 | 1.08789E-20 | 8.66258E-19 | 36.63675224 |
| 238584_at | IQCA1 | -3.040766715 | 7.18544891 | -11.87933872 | 1.58838E-19 | 9.05573E-18 | 33.97898859 |
| 204389_at | MAOA | -3.039320641 | 7.484888707 | -12.08020799 | 6.57404E-20 | 4.22487E-18 | 34.85357248 |
| 237054_at | ENPP5 | -3.03906014 | 6.4690606 | -12.97084539 | 1.38728E-21 | 1.43383E-19 | 38.67772633 |
| 202952_s_at | ADAM12 | 3.034800679 | 5.21351399 | 19.0411355 | 7.09543E-32 | 4.31048E-28 | 62.07220815 |
| 212488_at | COL5A1 | 3.034304143 | 7.692711666 | 16.10831152 | 3.73308E-27 | 2.4891E-24 | 51.36606525 |
| 204933_s_at | TNFRSF11B | -3.032056972 | 8.794393947 | -10.47789487 | 8.31908E-17 | 2.42878E-15 | 27.77098324 |
| 225834_at | FAM72A /// FAM72B /// FAM72C /// FAM72D | 3.028328559 | 5.929417137 | 8.997316789 | 7.15031E-14 | 1.15051E-12 | 21.07547003 |
| 202095_s_at | BIRC5 | 3.023756226 | 5.889820338 | 9.638420257 | 3.79335E-15 | 7.78827E-14 | 23.98448705 |
| 202870_s_at | CDC20 | 3.023453158 | 6.433616503 | 10.01518723 | 6.79837E-16 | 1.6175E-14 | 25.68838285 |
| 222848_at | CENPK | 3.022656975 | 4.760309473 | 9.004582783 | 6.91596E-14 | 1.11642E-12 | 21.10846937 |
| 227140_at | INHBA | 3.021837704 | 7.76688159 | 12.75067818 | 3.57083E-21 | 3.3097E-19 | 37.74084903 |
| 225727_at | PLEKHH1 | -3.021341033 | 7.061716666 | -14.09032806 | 1.23966E-23 | 2.54807E-21 | 43.35006279 |
| 227241_at | MUC15 | -3.020807144 | 8.062459511 | -9.622523101 | 4.07929E-15 | 8.3098E-14 | 23.91247029 |
| 218009_s_at | PRC1 | 3.020609343 | 6.284987138 | 12.47882568 | 1.15637E-20 | 9.11013E-19 | 36.57625025 |
| 214157_at | GNAS | -3.019522813 | 7.711194633 | -13.46531903 | 1.69448E-22 | 2.32779E-20 | 40.76064751 |
| 231022_at | OCLN | -3.017139412 | 7.933681408 | -13.71524239 | 5.92086E-23 | 9.78016E-21 | 41.80197954 |
| 1554899_s_at | FCER1G | 3.014246449 | 7.125210849 | 9.70615032 | 2.78358E-15 | 5.8558E-14 | 24.29121652 |
| 209460_at | ABAT | -3.013822911 | 9.208298797 | -13.02927147 | 1.08047E-21 | 1.14932E-19 | 38.92538185 |
| 213790_at | ADAM12 | 3.012690838 | 4.509151757 | 16.94269051 | 1.5198E-28 | 1.69582E-25 | 54.52451822 |
| 200832_s_at | SCD | 3.01234983 | 6.530694653 | 11.48592442 | 9.04636E-19 | 4.23467E-17 | 32.25413287 |
| 209552_at | PAX8 | -3.010995469 | 10.25618163 | -12.35677013 | 1.96513E-20 | 1.45588E-18 | 36.05063717 |
| 221990_at | PAX8 | -3.004595256 | 8.25471943 | -15.18229113 | 1.44543E-25 | 5.68553E-23 | 47.75379537 |
| 218662_s_at | NCAPG | 3.003081377 | 5.678166535 | 11.26349484 | 2.43501E-18 | 1.00936E-16 | 31.27232154 |
| 204932_at | TNFRSF11B | -3.002454889 | 8.247338373 | -10.09522405 | 4.72276E-16 | 1.16524E-14 | 26.04949755 |
| 214701_s_at | FN1 | 2.999494052 | 6.663762832 | 13.74306789 | 5.26925E-23 | 8.86449E-21 | 41.91743408 |
| 202206_at | ARL4C | 2.994808649 | 6.856858888 | 10.97413804 | 8.88814E-18 | 3.23973E-16 | 29.98846503 |
| 241782_at | NEBL | -2.991790886 | 6.438882449 | -14.59087485 | 1.58112E-24 | 4.25851E-22 | 45.3879187 |
| 239183_at | ANGPTL1 | -2.982945683 | 6.989771427 | -13.41498745 | 2.09605E-22 | 2.78516E-20 | 40.54999659 |
| 205959_at | MMP13 | 2.98165773 | 4.717411321 | 8.766751468 | 2.05878E-13 | 3.02998E-12 | 20.02841634 |
| 204822_at | TTK | 2.977466553 | 5.349010697 | 10.32155177 | 1.68923E-16 | 4.61332E-15 | 27.06873732 |
| 211343_s_at | COL13A1 | 2.977234751 | 4.791200741 | 11.13711226 | 4.28263E-18 | 1.66184E-16 | 30.71246219 |
| 203917_at | CXADR | -2.971331126 | 10.41306772 | -11.33760985 | 1.74981E-18 | 7.57489E-17 | 31.59997578 |
| 225275_at | EDIL3 | 2.96828364 | 7.91794225 | 11.33449849 | 1.77424E-18 | 7.66243E-17 | 31.58623085 |
| 208792_s_at | CLU | -2.96059367 | 11.61024598 | -9.844390375 | 1.48084E-15 | 3.27926E-14 | 24.91672034 |
| 230493_at | SHISA2 | -2.9576599 | 9.262432304 | -11.15821864 | 3.89688E-18 | 1.53062E-16 | 30.80605884 |
| 203180_at | ALDH1A3 | 2.951838917 | 5.96171945 | 12.00032123 | 9.33216E-20 | 5.6442E-18 | 34.50625473 |
| 202589_at | TYMS | 2.950851606 | 7.433210738 | 8.789039837 | 1.85871E-13 | 2.7608E-12 | 20.12961622 |
| 231773_at | ANGPTL1 | -2.950807246 | 8.271046636 | -13.46533826 | 1.69435E-22 | 2.32779E-20 | 40.76072791 |
| 207761_s_at | METTL7A | -2.949970704 | 12.09143841 | -13.41468416 | 2.09874E-22 | 2.78516E-20 | 40.54872627 |
| 209590_at | BMP7 | -2.9482308 | 8.667616958 | -14.05704855 | 1.42314E-23 | 2.89258E-21 | 43.21343166 |
| 226834_at | CLMP | 2.947950863 | 6.276039633 | 11.94165336 | 1.20755E-19 | 7.09921E-18 | 34.25075934 |
| 232278_s_at | DEPDC1 | 2.947814989 | 4.195793413 | 11.17617222 | 3.59633E-18 | 1.42176E-16 | 30.88564364 |
| 204962_s_at | CENPA /// SLC35F6 | 2.947018317 | 5.845942449 | 9.948881602 | 9.19571E-16 | 2.12846E-14 | 25.38897631 |
| 228806_at | RORC | -2.944398456 | 7.103255665 | -15.38074754 | 6.54169E-26 | 2.86134E-23 | 48.53743127 |
| 219985_at | HS3ST3A1 | 2.94233068 | 4.682338536 | 9.3978427 | 1.14041E-14 | 2.15602E-13 | 22.89381624 |
| 211719_x_at | FN1 | 2.941377818 | 11.43907657 | 14.15981132 | 9.29695E-24 | 1.95504E-21 | 43.63487421 |
| 227081_at | DNALI1 | -2.937964343 | 7.544475964 | -15.9482227 | 6.96938E-27 | 4.18737E-24 | 50.74963937 |
| 228273_at | PRR11 | 2.934558608 | 7.143006735 | 11.16237998 | 3.82504E-18 | 1.50456E-16 | 30.82450777 |
| 244572_at | KY | -2.934285957 | 6.852049351 | -16.61368998 | 5.31402E-28 | 4.92447E-25 | 53.2899847 |
| 209612_s_at | ADH1B | -2.926111163 | 7.43649586 | -7.678169591 | 2.98452E-11 | 2.97013E-10 | 15.10767705 |
| 204033_at | TRIP13 | 2.924528052 | 5.918874766 | 12.84049731 | 2.42641E-21 | 2.36057E-19 | 38.12374624 |
| 224027_at | CCL28 | -2.924201082 | 6.534331662 | -14.80204746 | 6.69536E-25 | 2.00038E-22 | 46.23792617 |
| 226863_at | FAM110C | -2.920680405 | 7.060502769 | -11.42517467 | 1.18501E-18 | 5.3679E-17 | 31.98643895 |
| 226614_s_at | FAM167A | -2.914363615 | 9.75222294 | -12.34989301 | 2.02483E-20 | 1.49605E-18 | 36.02097231 |
| 202890_at | MAP7 | -2.91369218 | 8.583983842 | -13.47288823 | 1.64119E-22 | 2.2717E-20 | 40.79229948 |
| 205612_at | MMRN1 | -2.90997012 | 6.670286524 | -10.45821155 | 9.09419E-17 | 2.63082E-15 | 27.68265962 |
| 212230_at | PPAP2B | -2.909907196 | 10.83285979 | -13.80119541 | 4.13145E-23 | 7.21683E-21 | 42.15830437 |
| 204793_at | GPRASP1 | -2.90748454 | 8.532112779 | -13.50617262 | 1.42615E-22 | 2.02532E-20 | 40.93140003 |
| 218468_s_at | GREM1 | 2.907410717 | 4.852499868 | 8.577885168 | 4.89504E-13 | 6.69091E-12 | 19.17118996 |
| 223572_at | HHATL | -2.906743895 | 7.356873177 | -10.41302719 | 1.11588E-16 | 3.16447E-15 | 27.47980959 |
| 218469_at | GREM1 | 2.903124025 | 6.1261074 | 8.126937672 | 3.85922E-12 | 4.47514E-11 | 17.12881292 |
| 243296_at | NAMPT | 2.898583203 | 7.180830325 | 11.12874907 | 4.44589E-18 | 1.71303E-16 | 30.67536475 |
| 203755_at | BUB1B | 2.897761849 | 5.996897906 | 9.286097012 | 1.90265E-14 | 3.44919E-13 | 22.38672492 |
| 227417_at | 2-Mar | -2.896120836 | 7.711122175 | -12.83488146 | 2.48568E-21 | 2.41393E-19 | 38.0998337 |
| 229147_at | RASSF6 | -2.895272195 | 6.63266989 | -12.58076421 | 7.43548E-21 | 6.29311E-19 | 37.01394246 |
| 214452_at | BCAT1 | 2.892037103 | 4.653256766 | 15.24656496 | 1.1175E-25 | 4.52588E-23 | 48.00815656 |
| 219493_at | SHCBP1 | 2.887453271 | 5.089063639 | 8.65973382 | 3.36331E-13 | 4.75903E-12 | 19.54260308 |
| 205139_s_at | UST | -2.881737128 | 8.571133698 | -12.74177679 | 3.7104E-21 | 3.40784E-19 | 37.70285117 |
| 211506_s_at | CXCL8 | 2.8817145 | 4.838662648 | 8.879100493 | 1.22972E-13 | 1.88756E-12 | 20.53858392 |
| 224339_s_at | ANGPTL1 | -2.879074278 | 7.462374043 | -13.09103527 | 8.2995E-22 | 9.13029E-20 | 39.1867406 |
| 206517_at | CDH16 | -2.87746669 | 7.637534461 | -16.3207902 | 1.63831E-27 | 1.16331E-24 | 52.17902427 |
| 212444_at | GPRC5A | -2.873380236 | 9.425616079 | -11.52852287 | 7.4877E-19 | 3.57858E-17 | 32.44163358 |
| 208396_s_at | PDE1A | -2.872394196 | 8.257167011 | -11.14072379 | 4.214E-18 | 1.6422E-16 | 30.72848036 |
| 202207_at | ARL4C | 2.866871849 | 8.056674521 | 9.904802759 | 1.12421E-15 | 2.55682E-14 | 25.18981935 |
| 213664_at | SLC1A1 | -2.866190777 | 8.931914484 | -12.11226982 | 5.71283E-20 | 3.74519E-18 | 34.99277389 |
| 223681_s_at | INADL | -2.864104496 | 7.252752414 | -11.40323819 | 1.30647E-18 | 5.83301E-17 | 31.88969036 |
| 206364_at | KIF14 | 2.862573428 | 4.988518343 | 13.20547124 | 5.09695E-22 | 6.00594E-20 | 39.66977037 |
| 205476_at | CCL20 | 2.861909907 | 4.738758977 | 10.12658532 | 4.09492E-16 | 1.02093E-14 | 26.19090281 |
| 220723_s_at | CWH43 | -2.861883284 | 7.215036485 | -11.2014925 | 3.2116E-18 | 1.2864E-16 | 30.99783546 |
| 236644_at | RNF180 | -2.86106262 | 5.82415251 | -13.70918297 | 6.0732E-23 | 1.00016E-20 | 41.77682467 |
| 219306_at | KIF15 | 2.860242557 | 4.548996307 | 11.92978406 | 1.27223E-19 | 7.39206E-18 | 34.19902531 |
| 225809_at | PARM1 | -2.859658623 | 9.517622828 | -11.01089933 | 7.537E-18 | 2.79759E-16 | 30.15196919 |
| 204304_s_at | PROM1 | -2.858840816 | 6.738366496 | -8.993887497 | 7.26366E-14 | 1.16772E-12 | 21.05989548 |
| 1553986_at | RASEF | -2.855867687 | 8.307132892 | -10.18573747 | 3.12944E-16 | 8.04808E-15 | 26.45746737 |
| 203571_s_at | ADIRF | -2.855507004 | 10.33510607 | -9.559835639 | 5.43352E-15 | 1.08859E-13 | 23.62840517 |
| 226811_at | FAM46C | -2.854296033 | 9.079001359 | -11.85996792 | 1.7298E-19 | 9.72011E-18 | 33.89442541 |
| 204641_at | NEK2 | 2.854228223 | 4.841828686 | 10.63905002 | 4.01575E-17 | 1.25249E-15 | 28.4931194 |
| 239765_at | CPEB3 | -2.853756019 | 5.824324959 | -15.68936917 | 1.92569E-26 | 1.00274E-23 | 49.74579248 |
| 204337_at | RGS4 | 2.851403918 | 7.412631927 | 10.25639776 | 2.27032E-16 | 6.03157E-15 | 26.77563057 |
| 209293_x_at | ID4 | -2.845994198 | 9.130728885 | -15.57550001 | 3.01946E-26 | 1.50081E-23 | 49.30141251 |
| 1555728_a_at | MS4A4A | 2.84391715 | 6.349398819 | 11.25077551 | 2.57721E-18 | 1.05867E-16 | 31.21604076 |
| 227341_at | BEND7 | -2.839807973 | 7.994189097 | -11.58970724 | 5.70852E-19 | 2.81437E-17 | 32.71063582 |
| 227334_at | USP54 | -2.8374581 | 9.344252782 | -14.02278306 | 1.64071E-23 | 3.29801E-21 | 43.07260483 |
| 218883_s_at | CENPU | 2.836311563 | 6.471922824 | 9.557869928 | 5.48259E-15 | 1.09762E-13 | 23.61949565 |
| 204719_at | ABCA8 | -2.833029221 | 7.883220833 | -8.903005077 | 1.10202E-13 | 1.70659E-12 | 20.64714472 |
| 206407_s_at | CCL13 | 2.830724454 | 6.686053132 | 11.23328802 | 2.78645E-18 | 1.13524E-16 | 31.13863801 |
| 209841_s_at | LRRN3 | -2.828979452 | 8.627201544 | -10.69603077 | 3.10545E-17 | 9.97008E-16 | 28.74800573 |
| 227889_at | LPCAT2 | -2.826670347 | 9.668261575 | -15.1432523 | 1.69037E-25 | 6.5547E-23 | 47.59903624 |
| 219049_at | CSGALNACT1 | -2.82036621 | 10.10795519 | -15.55262887 | 3.30561E-26 | 1.60291E-23 | 49.21195119 |
| 202238_s_at | LOC101928916 /// NNMT | 2.819229098 | 8.026826294 | 13.63515846 | 8.28612E-23 | 1.27618E-20 | 41.46915032 |
| 203954_x_at | CLDN3 | -2.816114902 | 9.098456049 | -12.50914644 | 1.0139E-20 | 8.20048E-19 | 36.70656162 |
| 211924_s_at | PLAUR | 2.815223685 | 7.53278976 | 16.95326604 | 1.46019E-28 | 1.66325E-25 | 54.56396787 |
| 209504_s_at | PLEKHB1 | -2.808478176 | 6.916272864 | -15.33326597 | 7.9044E-26 | 3.32441E-23 | 48.35041349 |
| 210511_s_at | INHBA | 2.808113108 | 6.439641654 | 12.17638116 | 4.31573E-20 | 2.96233E-18 | 35.27079132 |
| 227753_at | TMEM139 | -2.807774843 | 7.436857567 | -14.80858222 | 6.52026E-25 | 1.95876E-22 | 46.26413709 |
| 214308_s_at | HGD | -2.802865435 | 7.793673839 | -15.51628697 | 3.81762E-26 | 1.76888E-23 | 49.06965706 |
| 209925_at | OCLN | -2.79997472 | 6.992623015 | -11.45243012 | 1.04978E-18 | 4.81115E-17 | 32.10658333 |
| 225996_at | LONRF2 | -2.799353404 | 6.705112407 | -8.727072466 | 2.46971E-13 | 3.58554E-12 | 19.84827037 |
| 207165_at | HMMR | 2.795917834 | 6.002157032 | 8.243358391 | 2.26603E-12 | 2.73802E-11 | 17.65526744 |
| 202888_s_at | ANPEP | 2.795293156 | 6.111784131 | 13.74886224 | 5.14291E-23 | 8.71088E-21 | 41.94146394 |
| 225105_at | C12orf75 | 2.794895819 | 6.81517184 | 9.638908569 | 3.78489E-15 | 7.77966E-14 | 23.98669904 |
| 241436_at | SCNN1G | -2.794392932 | 6.416333719 | -12.67069855 | 5.04116E-21 | 4.43841E-19 | 37.39910508 |
| 210135_s_at | SHOX2 | 2.793289588 | 4.302816831 | 11.12521824 | 4.51668E-18 | 1.73541E-16 | 30.65970091 |
| 226803_at | CHMP4C | -2.7928922 | 7.880324635 | -10.08585156 | 4.92849E-16 | 1.20728E-14 | 26.00722756 |
| 204689_at | HHEX | -2.790532559 | 9.767644291 | -13.00976162 | 1.17447E-21 | 1.23727E-19 | 38.84272919 |
| 226145_s_at | FRAS1 | -2.787322591 | 8.412831315 | -9.466337008 | 8.33446E-15 | 1.61134E-13 | 23.20450173 |
| 210751_s_at | RGN | -2.778343225 | 7.076540958 | -13.34972021 | 2.76294E-22 | 3.51311E-20 | 40.2763708 |
| 226829_at | AFAP1L2 | -2.776287805 | 8.185790324 | -14.18163758 | 8.49456E-24 | 1.81222E-21 | 43.72421225 |
| 220330_s_at | SAMSN1 | 2.770713843 | 6.396805528 | 6.408577809 | 8.69376E-09 | 5.76229E-08 | 9.518206196 |
| 214307_at | HGD | -2.769886305 | 6.951404242 | -14.32518893 | 4.69861E-24 | 1.11694E-21 | 44.3102643 |
| 208165_s_at | PRSS16 | -2.765186141 | 6.854924622 | -14.64438134 | 1.27108E-24 | 3.56392E-22 | 45.60384072 |
| 235048_at | FAM169A | -2.764187944 | 7.756247758 | -13.77468553 | 4.61595E-23 | 7.96143E-21 | 42.04850487 |
| 227180_at | ELOVL7 | -2.763509459 | 7.732341267 | -8.986138092 | 7.52647E-14 | 1.20819E-12 | 21.02470058 |
| 230093_at | RSPH1 | -2.761781186 | 6.515016398 | -16.41243753 | 1.15051E-27 | 8.98633E-25 | 52.52784676 |
| 231882_at | AP000525.9 | 2.760000224 | 5.722518013 | 14.86655971 | 5.15532E-25 | 1.60152E-22 | 46.49644069 |
| 1558487_a_at | TMED4 | -2.755836527 | 9.90334206 | -16.66492781 | 4.36887E-28 | 4.19067E-25 | 53.4831758 |
| 210715_s_at | SPINT2 | -2.754926216 | 10.55513517 | -12.19155739 | 4.03879E-20 | 2.78784E-18 | 35.33653756 |
| 225299_at | MYO5B | -2.754908781 | 7.534490486 | -11.82417021 | 2.02532E-19 | 1.11675E-17 | 33.73804895 |
| 212226_s_at | PPAP2B | -2.746360426 | 11.64925083 | -12.69500457 | 4.53925E-21 | 4.08196E-19 | 37.50304053 |
| 219368_at | NAP1L2 | -2.743822466 | 7.408991902 | -12.24160512 | 3.24594E-20 | 2.28701E-18 | 35.5531758 |
| 225646_at | CTSC | 2.74312667 | 7.637015012 | 12.1366886 | 5.13379E-20 | 3.43142E-18 | 35.09871772 |
| 236641_at | KIF14 | 2.734306774 | 4.254174191 | 11.65856569 | 4.20834E-19 | 2.13839E-17 | 33.01294074 |
| 212328_at | LIMCH1 | -2.73056406 | 9.441846947 | -11.60384501 | 5.36192E-19 | 2.65908E-17 | 32.77274194 |
| 220108_at | GNA14 | -2.728388569 | 7.135424688 | -12.95920206 | 1.4582E-21 | 1.50429E-19 | 38.62832412 |
| 202237_at | LOC101928916 /// NNMT | 2.721903417 | 9.457572597 | 13.60443033 | 9.42863E-23 | 1.42801E-20 | 41.34123095 |
| 226936_at | CENPW | 2.718625147 | 6.97684387 | 11.86764272 | 1.67231E-19 | 9.44562E-18 | 33.92793433 |
| 220014_at | PRR16 | 2.718194508 | 4.191232187 | 11.13654417 | 4.29353E-18 | 1.66253E-16 | 30.70994249 |
| 204232_at | FCER1G | 2.71804185 | 7.968372304 | 10.03767496 | 6.13674E-16 | 1.47355E-14 | 25.78987775 |
| 1557136_at | ATP13A4 | -2.715065021 | 7.487942375 | -11.78980897 | 2.35667E-19 | 1.26946E-17 | 33.58782417 |
| 238756_at | GAS2L3 | 2.712152184 | 5.482735669 | 14.27449894 | 5.78965E-24 | 1.31918E-21 | 44.10362379 |
| 202729_s_at | LTBP1 | 2.708511716 | 7.879774492 | 15.61969328 | 2.53531E-26 | 1.29549E-23 | 49.47408131 |
| 221974_at | IPW /// LOC101930404 /// PWARSN /// SNORD107 /// SNORD115-13 /// SNORD115-26 /// SNORD115-7 /// SNORD116-22 /// SNORD116-28 /// SNORD116-4 /// SNRPN | -2.7081791 | 8.30756674 | -11.43466251 | 1.13606E-18 | 5.18049E-17 | 32.0282701 |
| 227769_at | GPR27 | -2.707869233 | 8.018199724 | -10.5937516 | 4.92713E-17 | 1.51209E-15 | 28.29032198 |
| 202953_at | C1QB | 2.704663711 | 8.012492908 | 8.865161511 | 1.31091E-13 | 2.00263E-12 | 20.47528255 |
| 226403_at | TMC4 | -2.70063029 | 8.340961032 | -12.05844223 | 7.23199E-20 | 4.55884E-18 | 34.75901035 |
| 230865_at | LIX1 | -2.696473068 | 5.170083477 | -9.095204056 | 4.56427E-14 | 7.66671E-13 | 21.52002199 |
| 214866_at | PLAUR | 2.696396928 | 6.185662539 | 15.71189981 | 1.76206E-26 | 9.44517E-24 | 49.83351739 |
| 218865_at | 1-Mar | -2.695869851 | 8.831266052 | -14.2018636 | 7.81337E-24 | 1.70878E-21 | 43.80694575 |
| 214823_at | ZNF204P | -2.695177121 | 6.941857003 | -13.10396716 | 7.85399E-22 | 8.71028E-20 | 39.24140489 |
| 212022_s_at | MKI67 | 2.693814711 | 5.36248547 | 10.92603688 | 1.10303E-17 | 3.92888E-16 | 29.7743559 |
| 219877_at | ZMAT4 | -2.688985531 | 7.334796121 | -15.21026704 | 1.2922E-25 | 5.19492E-23 | 47.86457555 |
| 238778_at | MPP7 | -2.688693561 | 6.997612587 | -10.51180183 | 7.13604E-17 | 2.1216E-15 | 27.9230703 |
| 205941_s_at | COL10A1 | 2.687302218 | 6.233029487 | 10.62810348 | 4.21916E-17 | 1.31144E-15 | 28.44412618 |
| 240395_at | DGKI /// LOC100128727 | -2.682589663 | 6.76149425 | -8.779102141 | 1.94539E-13 | 2.87627E-12 | 20.0844936 |
| 206806_at | DGKI | -2.682442496 | 7.07273499 | -11.25096692 | 2.57501E-18 | 1.05856E-16 | 31.21688782 |
| 207039_at | CDKN2A | 2.680346789 | 4.882106877 | 9.310477208 | 1.70156E-14 | 3.12401E-13 | 22.49738046 |
| 229130_at | AX746755 /// RP11-774O3.3 | -2.680071004 | 7.454717517 | -13.08189918 | 8.6295E-22 | 9.45527E-20 | 39.14810932 |
| 207426_s_at | TNFSF4 | 2.676699674 | 5.641135322 | 10.98595885 | 8.42904E-18 | 3.09093E-16 | 30.04105298 |
| 213139_at | SNAI2 | 2.676256945 | 7.939552358 | 13.04984023 | 9.89557E-22 | 1.06714E-19 | 39.01247117 |
| 206432_at | HAS2 | 2.674939768 | 4.819944532 | 8.948127071 | 8.95995E-14 | 1.41381E-12 | 20.85206871 |
| 226930_at | FNDC1 | -2.674606264 | 8.895149797 | -9.866827662 | 1.33677E-15 | 2.98318E-14 | 25.01816882 |
| 232231_at | RUNX2 | 2.669742579 | 7.25532077 | 8.828008185 | 1.55448E-13 | 2.33685E-12 | 20.30656404 |
| 205098_at | CCR1 | 2.662626103 | 6.511721875 | 10.81372374 | 1.82756E-17 | 6.17946E-16 | 29.27369882 |
| 212481_s_at | TPM4 | 2.661499414 | 7.200956762 | 14.29421844 | 5.33775E-24 | 1.24188E-21 | 44.18405072 |
| 202917_s_at | S100A8 | 2.660835494 | 7.996294702 | 7.0568137 | 4.92857E-10 | 3.99569E-09 | 12.34164166 |
| 201761_at | MTHFD2 | 2.659312272 | 8.2434031 | 9.032699621 | 6.07927E-14 | 9.93377E-13 | 21.23616419 |
| 201852_x_at | COL3A1 | 2.659190812 | 10.86862239 | 13.7530889 | 5.05269E-23 | 8.66005E-21 | 41.95898977 |
| 219386_s_at | SLAMF8 | 2.65878288 | 6.245626811 | 7.550725277 | 5.32145E-11 | 5.07059E-10 | 14.53675177 |
| 203608_at | ALDH5A1 | -2.658639965 | 8.213197991 | -11.07724592 | 5.59858E-18 | 2.11397E-16 | 30.446774 |
| 206167_s_at | ARHGAP6 | -2.658073208 | 9.18779058 | -11.9656032 | 1.08692E-19 | 6.45245E-18 | 34.35510324 |
| 208937_s_at | ID1 | -2.656844812 | 11.3074238 | -12.02012318 | 8.55541E-20 | 5.24402E-18 | 34.59240934 |
| 228503_at | RPS6KA6 | -2.656731435 | 6.784058725 | -15.0448642 | 2.51015E-25 | 8.91184E-23 | 47.20811648 |
| 226482_s_at | TSTD1 | -2.655598858 | 10.30590403 | -11.09135798 | 5.25576E-18 | 1.99416E-16 | 30.5094314 |
| 202705_at | CCNB2 | 2.65320973 | 6.569712523 | 9.101870724 | 4.42686E-14 | 7.46112E-13 | 21.5502967 |
| 222717_at | SDPR | -2.653073351 | 8.852089533 | -9.853630364 | 1.41972E-15 | 3.15669E-14 | 24.95850091 |
| 213050_at | COBL | -2.652929836 | 7.809624095 | -13.0635923 | 9.33105E-22 | 1.02035E-19 | 39.07066988 |
| 241672_at | SERTM1 | -2.65239797 | 5.888984105 | -8.601440901 | 4.39392E-13 | 6.06968E-12 | 19.27806605 |
| 202503_s_at | KIAA0101 | 2.650408556 | 8.572444964 | 8.871106811 | 1.27565E-13 | 1.95422E-12 | 20.50228191 |
| 230285_at | SVIP | -2.650215488 | 8.157381646 | -13.48038889 | 1.59004E-22 | 2.21774E-20 | 40.82365788 |
| 225353_s_at | C1QC | 2.649761426 | 8.195579876 | 9.67668115 | 3.18478E-15 | 6.63344E-14 | 24.1577795 |
| 244008_at | PARP8 | -2.649256358 | 8.206617456 | -16.0860444 | 4.07094E-27 | 2.64974E-24 | 51.28052666 |
| 203407_at | PPL | -2.648880879 | 8.227535644 | -10.21956611 | 2.68363E-16 | 7.00369E-15 | 26.60982442 |
| 235182_at | ISM1 | -2.647406555 | 8.354882541 | -9.896974525 | 1.16506E-15 | 2.63657E-14 | 25.15444043 |
| 202768_at | FOSB | -2.644474758 | 8.901251566 | -6.122855959 | 3.00504E-08 | 1.82032E-07 | 8.301285702 |
| 227318_at | TMEM178B | -2.64411939 | 7.491229208 | -12.57020967 | 7.78292E-21 | 6.52655E-19 | 36.96867952 |
| 212148_at | PBX1 | -2.643115766 | 9.439338914 | -11.43632422 | 1.1277E-18 | 5.14665E-17 | 32.03559561 |
| 214770_at | MSR1 | 2.641570399 | 5.651550357 | 10.42647226 | 1.04996E-16 | 2.99149E-15 | 27.54018375 |
| 214528_s_at | PAX8 | -2.640697139 | 8.20867103 | -10.5026354 | 7.43812E-17 | 2.20303E-15 | 27.88196272 |
| 1555756_a_at | CLEC7A | 2.640051981 | 4.782718462 | 10.59008457 | 5.00942E-17 | 1.53268E-15 | 28.27389854 |
| 203535_at | S100A9 | 2.637084125 | 7.548018307 | 10.83026381 | 1.69649E-17 | 5.78637E-16 | 29.34749205 |
| 204338_s_at | RGS4 | 2.635258687 | 4.973202072 | 8.923364527 | 1.00376E-13 | 1.56847E-12 | 20.73960753 |
| 227641_at | FBXL16 | -2.635178499 | 8.497550515 | -13.67082921 | 7.13334E-23 | 1.12396E-20 | 41.61749743 |
| 211712_s_at | ANXA9 | -2.634195245 | 6.857645764 | -13.24397056 | 4.32739E-22 | 5.1886E-20 | 39.83191744 |
| 232060_at | ROR1 | 2.633783717 | 5.014058058 | 11.77675458 | 2.49638E-19 | 1.33291E-17 | 33.53071987 |
| 222901_s_at | KCNJ16 | -2.633423529 | 6.940721771 | -12.0636514 | 7.06873E-20 | 4.48356E-18 | 34.78164639 |
| 220432_s_at | CYP39A1 | -2.628080549 | 6.125693458 | -11.59199631 | 5.65091E-19 | 2.791E-17 | 32.72069284 |
| 243278_at | FOXP2 | -2.628015883 | 6.714982148 | -10.09215834 | 4.78909E-16 | 1.17894E-14 | 26.03567172 |
| 226997_at | ADAMTS12 | 2.627566088 | 6.164261481 | 17.25880917 | 4.62372E-29 | 6.83248E-26 | 55.69746752 |
| 209368_at | EPHX2 | -2.626999868 | 7.314286329 | -15.67899366 | 2.00612E-26 | 1.03476E-23 | 49.70537214 |
| 205979_at | SCGB2A1 | -2.624190022 | 6.17828258 | -9.816483768 | 1.68194E-15 | 3.6843E-14 | 24.79051241 |
| 219434_at | TREM1 | 2.62365574 | 5.473107731 | 9.286818177 | 1.89638E-14 | 3.44124E-13 | 22.38999825 |
| 204446_s_at | ALOX5 | 2.620842233 | 7.597338182 | 6.548365755 | 4.7103E-09 | 3.25706E-08 | 10.12029501 |
| 227091_at | CCDC146 | -2.620656882 | 7.55238288 | -14.41311916 | 3.27339E-24 | 8.20976E-22 | 44.66793082 |
| 205579_at | HRH1 | 2.620348548 | 5.584075526 | 17.50341649 | 1.85701E-29 | 3.1146E-26 | 56.59621738 |
| 228708_at | RAB27B | 2.618910142 | 5.50927058 | 12.29308378 | 2.59323E-20 | 1.87794E-18 | 35.77572163 |
| 229930_at | LINC01315 | -2.618452995 | 9.192750815 | -16.41631408 | 1.13347E-27 | 8.98149E-25 | 52.5425772 |
| 206385_s_at | ANK3 | -2.613815641 | 9.618264823 | -10.56402414 | 5.63538E-17 | 1.7108E-15 | 28.15715493 |
| 203305_at | F13A1 | 2.6121236 | 8.578252119 | 12.01517822 | 8.74307E-20 | 5.33513E-18 | 34.57089864 |
| 235545_at | DEPDC1 | 2.611863927 | 4.251827641 | 11.46425928 | 9.96026E-19 | 4.59559E-17 | 32.1587055 |
| 226806_s_at | NFIA | -2.610947525 | 9.874621061 | -12.50774577 | 1.02008E-20 | 8.23549E-19 | 36.70054415 |
| 201438_at | COL6A3 | 2.610313297 | 10.39277067 | 16.9544075 | 1.4539E-28 | 1.66325E-25 | 54.56822496 |
| 228523_at | NANOS1 | -2.608269959 | 6.737329151 | -11.11775808 | 4.66999E-18 | 1.78929E-16 | 30.62660171 |
| 214053_at | ERBB4 | -2.607429553 | 6.724055866 | -13.31879415 | 3.14989E-22 | 3.95001E-20 | 40.14653385 |
| 227314_at | ITGA2 | 2.602879124 | 6.818873611 | 11.68245994 | 3.78625E-19 | 1.94196E-17 | 33.11773276 |
| 220724_at | CWH43 | -2.601171906 | 6.113907122 | -9.919234887 | 1.05262E-15 | 2.40803E-14 | 25.25503654 |
| 209949_at | NCF2 | 2.598198129 | 5.926262155 | 9.887791273 | 1.21488E-15 | 2.73461E-14 | 25.11293408 |
| 209840_s_at | LRRN3 | -2.596125006 | 8.286801592 | -9.520698532 | 6.49886E-15 | 1.28276E-13 | 23.45099582 |
| 209900_s_at | SLC16A1 | 2.596119542 | 5.508653424 | 14.736384 | 8.74085E-25 | 2.55565E-22 | 45.97424103 |
| 201105_at | LGALS1 | 2.592040513 | 11.20482614 | 17.70773495 | 8.71677E-30 | 1.64341E-26 | 57.34104443 |
| 202992_at | C7 | -2.590576203 | 8.61676069 | -7.217929297 | 2.39167E-10 | 2.04543E-09 | 13.05425301 |
| 230006_s_at | SVIP | -2.589745096 | 8.513994171 | -13.4603887 | 1.73013E-22 | 2.36488E-20 | 40.74002657 |
| 235165_at | PARD6B | -2.583731281 | 6.978351008 | -10.80001523 | 1.94387E-17 | 6.53634E-16 | 29.21252236 |
| 214044_at | RYR2 | -2.576745846 | 6.184192894 | -14.6011395 | 1.51624E-24 | 4.12341E-22 | 45.42936984 |
| 231213_at | PDE1A | -2.574072346 | 7.520503843 | -10.22385027 | 2.63191E-16 | 6.88187E-15 | 26.62911464 |
| 244675_at | RGS8 | -2.571939548 | 6.409789177 | -10.44388711 | 9.70346E-17 | 2.78643E-15 | 27.61836631 |
| 228494_at | PPP1R9A | -2.569977985 | 7.334913085 | -8.634262884 | 3.78001E-13 | 5.29792E-12 | 19.42700558 |
| 229831_at | CNTN3 | -2.56897524 | 6.291765084 | -10.72458853 | 2.73031E-17 | 8.86458E-16 | 28.87565979 |
| 221245_s_at | FZD5 | -2.56887523 | 8.570868557 | -13.86751771 | 3.13172E-23 | 5.6976E-21 | 42.43261172 |
| 1554648_a_at | DUOXA1 | -2.567667071 | 6.901615142 | -14.12346141 | 1.08064E-23 | 2.24655E-21 | 43.48595322 |
| 206307_s_at | FOXD1 | 2.56682865 | 5.136680071 | 10.82914244 | 1.70507E-17 | 5.812E-16 | 29.34248976 |
| 223611_s_at | LNX1 | -2.564132429 | 8.378097133 | -12.27684362 | 2.78346E-20 | 1.99196E-18 | 35.7055458 |
| 225822_at | TMEM125 | -2.563950531 | 8.400322897 | -14.26250224 | 6.08323E-24 | 1.36312E-21 | 44.05467019 |
| 212942_s_at | CEMIP | 2.562255932 | 5.973790062 | 9.548830992 | 5.71403E-15 | 1.14145E-13 | 23.57852547 |
| 215047_at | TRIM58 | -2.560842084 | 5.971914565 | -12.13742647 | 5.11725E-20 | 3.42874E-18 | 35.10191804 |
| 206197_at | NME5 | -2.560627726 | 7.55562476 | -12.26363396 | 2.94851E-20 | 2.09909E-18 | 35.64844367 |
| 234994_at | TMEM200A | 2.56003335 | 6.503623743 | 10.55697945 | 5.81768E-17 | 1.76396E-15 | 28.12558842 |
| 1567107_s_at | TPM4 | 2.560019825 | 5.956212239 | 13.13861255 | 6.77544E-22 | 7.74661E-20 | 39.38775478 |
| 204318_s_at | GTSE1 | 2.557398352 | 5.21360769 | 10.34308753 | 1.53205E-16 | 4.21778E-15 | 27.16556237 |
| 225664_at | COL12A1 | 2.552879122 | 8.121979596 | 13.53950087 | 1.23922E-22 | 1.82136E-20 | 41.07054609 |
| 205046_at | CENPE | 2.552752927 | 5.17544886 | 11.483516 | 9.14364E-19 | 4.2656E-17 | 32.24352686 |
| 214841_at | CNIH3 | 2.552647348 | 5.290246138 | 10.06533506 | 5.41077E-16 | 1.31482E-14 | 25.91468173 |
| 228108_at | PPM1L | -2.552083236 | 7.512821881 | -10.93294953 | 1.06932E-17 | 3.82373E-16 | 29.80513732 |
| 209114_at | TSPAN1 | -2.551267335 | 9.413488074 | -10.54436115 | 6.15914E-17 | 1.8564E-15 | 28.06903851 |
| 219619_at | DIRAS2 | -2.550791689 | 5.517737095 | -10.56614088 | 5.58173E-17 | 1.69639E-15 | 28.16663916 |
| 203083_at | THBS2 | 2.550439577 | 8.069583825 | 15.05513002 | 2.40856E-25 | 8.72106E-23 | 47.24896435 |
| 206209_s_at | CA4 | -2.5498459 | 7.351370013 | -11.26136675 | 2.45824E-18 | 1.01821E-16 | 31.26290613 |
| 226587_at | PWAR6 | -2.545169353 | 8.082770773 | -9.40159689 | 1.12098E-14 | 2.12221E-13 | 22.91084788 |
| 230281_at | C16orf46 | -2.544556436 | 7.867079052 | -17.11250549 | 8.0075E-29 | 1.09452E-25 | 55.15622081 |
| 238673_at | SAMD12 | -2.543569294 | 7.47002704 | -10.65466593 | 3.74248E-17 | 1.17665E-15 | 28.5629962 |
| 219277_s_at | OGDHL | -2.54229896 | 7.247192567 | -12.23937425 | 3.2777E-20 | 2.30641E-18 | 35.54352501 |
| 202342_s_at | TRIM2 | -2.540460252 | 9.109228277 | -12.15651233 | 4.70739E-20 | 3.18377E-18 | 35.18467808 |
| 231969_at | STOX2 | -2.537893487 | 7.328116039 | -11.79720991 | 2.28097E-19 | 1.23845E-17 | 33.62019072 |
| 235115_at | PDE8B | -2.537287232 | 5.347864911 | -13.04903435 | 9.92969E-22 | 1.06871E-19 | 39.00905995 |
| 231771_at | GJB6 | -2.537125236 | 6.651615481 | -6.806057054 | 1.50802E-09 | 1.12808E-08 | 11.24043272 |
| 207076_s_at | ASS1 | -2.536796316 | 9.666344768 | -11.27800086 | 2.28242E-18 | 9.51878E-17 | 31.33649027 |
| 230422_at | FPR3 | 2.536651829 | 6.311356558 | 8.520565123 | 6.3661E-13 | 8.50186E-12 | 18.91117812 |
| 203639_s_at | FGFR2 | -2.535639136 | 6.987620143 | -12.93744009 | 1.60069E-21 | 1.63584E-19 | 38.53594561 |
| 209408_at | KIF2C | 2.5355037 | 6.961352459 | 10.86504896 | 1.4508E-17 | 5.03316E-16 | 29.50261521 |
| 206102_at | GINS1 | 2.534719338 | 6.039320695 | 10.37965944 | 1.298E-16 | 3.63381E-15 | 27.32992334 |
| 238116_at | DYNLRB2 | -2.532445585 | 6.290309841 | -15.93797399 | 7.25437E-27 | 4.26487E-24 | 50.71006181 |
| 205681_at | BCL2A1 | 2.53086563 | 6.248392648 | 5.957437636 | 6.10998E-08 | 3.52201E-07 | 7.606065805 |
| 213629_x_at | MT1F | -2.529319811 | 11.87929391 | -12.98965746 | 1.27995E-21 | 1.33552E-19 | 38.75751113 |
| 213418_at | HSPA6 | 2.527814211 | 6.830348516 | 9.461664515 | 8.51463E-15 | 1.64269E-13 | 23.18331132 |
| 234192_s_at | GKAP1 | -2.527372403 | 7.390446954 | -13.85423602 | 3.31024E-23 | 5.95623E-21 | 42.3777235 |
| 219773_at | NOX4 | 2.526910302 | 4.389353304 | 12.28004145 | 2.74493E-20 | 1.96954E-18 | 35.71936632 |
| 219947_at | CLEC4A | 2.525490552 | 5.954710688 | 8.928502144 | 9.80387E-14 | 1.53545E-12 | 20.76294032 |
| 202912_at | ADM | 2.524904248 | 8.610191698 | 12.77545063 | 3.20958E-21 | 3.01518E-19 | 37.84654784 |
| 228347_at | SIX1 | 2.521204153 | 6.305735521 | 12.88994492 | 1.96226E-21 | 1.93658E-19 | 38.33413567 |
| 237411_at | ADAMTS6 | 2.515663918 | 4.378913758 | 10.3790575 | 1.30155E-16 | 3.64187E-15 | 27.3272188 |
| 210559_s_at | CDK1 | 2.513315533 | 6.842674034 | 9.559289889 | 5.4471E-15 | 1.09092E-13 | 23.62593159 |
| 236085_at | CAPSL | -2.505005117 | 6.356206083 | -12.12503134 | 5.40246E-20 | 3.58471E-18 | 35.0481493 |
| 205394_at | CHEK1 | 2.502279742 | 4.863643769 | 10.02562187 | 6.48291E-16 | 1.54851E-14 | 25.73548118 |
| 228069_at | MTFR2 | 2.501874613 | 4.654977966 | 9.36706488 | 1.31303E-14 | 2.45604E-13 | 22.75417463 |
| 236313_at | CDKN2B | 2.500571205 | 4.222308651 | 12.6579464 | 5.32645E-21 | 4.64471E-19 | 37.34454803 |
| 225354_s_at | SH3BGRL2 | -2.500379055 | 9.52603462 | -13.74982414 | 5.12224E-23 | 8.71088E-21 | 41.94545267 |
| 222953_at | GPR83 | -2.497985331 | 6.607452771 | -12.02333781 | 8.43559E-20 | 5.19526E-18 | 34.60639171 |
| 232523_at | MEGF10 | 2.497615257 | 4.25961158 | 7.456102017 | 8.1677E-11 | 7.54707E-10 | 14.11393024 |
| 204606_at | CCL21 | -2.497492111 | 8.926968227 | -8.260731396 | 2.09286E-12 | 2.54339E-11 | 17.7338861 |
| 237083_at | RP4-813F11.4 | -2.497254155 | 6.125300496 | -16.63248125 | 4.94554E-28 | 4.66202E-25 | 53.36087657 |
| 237159_x_at | AP1S3 | -2.495234785 | 6.107202423 | -13.03601547 | 1.04977E-21 | 1.12102E-19 | 38.95394192 |
| 201108_s_at | THBS1 | 2.493887334 | 6.535097284 | 13.66531754 | 7.30031E-23 | 1.14697E-20 | 41.59458593 |
| 32128_at | CCL18 | 2.489013593 | 8.308469517 | 5.585865219 | 2.93187E-07 | 1.50845E-06 | 6.072796603 |
| 220658_s_at | ARNTL2 | 2.488337401 | 4.636308029 | 12.50447742 | 1.03463E-20 | 8.31891E-19 | 36.68650205 |
| 202236_s_at | SLC16A1 | 2.485255329 | 6.486446052 | 12.9820338 | 1.3224E-21 | 1.37457E-19 | 38.72518314 |
| 203570_at | LOXL1 | 2.483240224 | 7.422416525 | 12.26792861 | 2.8938E-20 | 2.06552E-18 | 35.66701049 |
| 213831_at | HLA-DQA1 /// LOC100509457 | 2.483092305 | 6.754875736 | 4.102811557 | 9.55744E-05 | 0.000316776 | 0.473940152 |
| 201130_s_at | CDH1 | -2.482985027 | 6.427724574 | -11.67103311 | 3.98252E-19 | 2.03689E-17 | 33.06762565 |
| 227449_at | EPHA4 | -2.482122789 | 7.623611251 | -9.473685909 | 8.05879E-15 | 1.56135E-13 | 23.23782888 |
| 208079_s_at | AURKA | 2.481620999 | 6.435400161 | 10.08665345 | 4.91054E-16 | 1.20396E-14 | 26.01084426 |
| 1554748_at | CLCNKB | -2.481350602 | 7.899030088 | -13.28925258 | 3.57041E-22 | 4.37696E-20 | 40.02239992 |
| 211161_s_at | COL3A1 | 2.480719871 | 10.4525158 | 13.04762342 | 9.98973E-22 | 1.07306E-19 | 39.00308751 |
| 226733_at | PFKFB2 | -2.479678271 | 8.085153987 | -11.61205572 | 5.17042E-19 | 2.57931E-17 | 32.80880196 |
| 206069_s_at | ACADL | -2.478267573 | 6.415337174 | -13.48843217 | 1.53698E-22 | 2.16583E-20 | 40.85727705 |
| 218824_at | PNMAL1 | -2.478059323 | 8.58228086 | -9.199346499 | 2.83152E-14 | 4.94453E-13 | 21.99290984 |
| 200965_s_at | ABLIM1 | -2.476601557 | 9.805142382 | -11.13270787 | 4.36785E-18 | 1.68891E-16 | 30.69292596 |
| 223278_at | GJB2 | 2.475990779 | 6.167546316 | 6.3780187 | 9.93512E-09 | 6.52652E-08 | 9.387144959 |
| 201920_at | SLC20A1 | 2.475436349 | 8.789566645 | 14.18900142 | 8.23989E-24 | 1.77368E-21 | 43.75433973 |
| 212992_at | AHNAK2 | 2.474891703 | 6.529674059 | 10.37053127 | 1.35283E-16 | 3.77762E-15 | 27.28890759 |
| 201042_at | TGM2 | 2.47082979 | 7.624512578 | 11.84421271 | 1.85411E-19 | 1.03654E-17 | 33.82561756 |
| 202363_at | SPOCK1 | 2.468201641 | 7.501379505 | 10.34823253 | 1.49673E-16 | 4.1351E-15 | 27.18869007 |
| 229302_at | TMEM178A | -2.464946154 | 7.046576176 | -11.66474406 | 4.09486E-19 | 2.08655E-17 | 33.04004238 |
| 229290_at | DAPL1 | -2.461582355 | 7.807439552 | -7.134303877 | 3.4823E-10 | 2.89662E-09 | 12.68392033 |
| 226545_at | CD109 | 2.461399662 | 6.872621252 | 13.33697251 | 2.91628E-22 | 3.67238E-20 | 40.2228663 |
| 207789_s_at | DPP6 | -2.461278153 | 7.082986308 | -12.99021396 | 1.27691E-21 | 1.3349E-19 | 38.75987068 |
| 213428_s_at | COL6A1 | 2.458775667 | 9.785788116 | 13.51809109 | 1.35625E-22 | 1.95209E-20 | 40.98117572 |
| 210179_at | KCNJ13 | -2.457485285 | 6.299753985 | -11.31342783 | 1.94891E-18 | 8.29233E-17 | 31.49312474 |
| 229994_at | NFIA | -2.457338546 | 6.087837992 | -9.64327827 | 3.71004E-15 | 7.63442E-14 | 24.00649294 |
| 219890_at | CLEC5A | 2.453011528 | 4.898686874 | 10.62874341 | 4.20699E-17 | 1.3084E-15 | 28.44699052 |
| 203029_s_at | PTPRN2 | -2.450898868 | 7.794288699 | -13.45131064 | 1.79776E-22 | 2.45118E-20 | 40.70205015 |
| 232267_at | GPR133 | -2.448626524 | 6.735026224 | -11.31315837 | 1.95125E-18 | 8.29584E-17 | 31.49193377 |
| 209740_s_at | PNPLA4 | -2.448560467 | 7.302537765 | -14.67573052 | 1.11869E-24 | 3.20233E-22 | 45.73017543 |
| 242005_at | LINC00973 | 2.448457527 | 3.525114137 | 8.140145528 | 3.63311E-12 | 4.23992E-11 | 17.18850286 |
| 202234_s_at | SLC16A1 | 2.446532224 | 4.898536329 | 14.26270499 | 6.07815E-24 | 1.36312E-21 | 44.0554977 |
| 203362_s_at | MAD2L1 | 2.446154729 | 6.956245042 | 8.566930272 | 5.14716E-13 | 7.00575E-12 | 19.12149042 |
| 238021_s_at | CRNDE | 2.444411677 | 6.451749522 | 9.842951705 | 1.49059E-15 | 3.29685E-14 | 24.91021476 |
| 205099_s_at | CCR1 | 2.444362302 | 6.038774331 | 12.59917575 | 6.86632E-21 | 5.84749E-19 | 37.09286941 |
| 204030_s_at | IQCJ-SCHIP1 /// SCHIP1 | 2.442837505 | 6.493585256 | 15.94517322 | 7.05298E-27 | 4.19154E-24 | 50.73786462 |
| 205624_at | CPA3 | 2.440451849 | 4.95481608 | 10.49575414 | 7.6733E-17 | 2.26655E-15 | 27.85109936 |
| 221698_s_at | CLEC7A | 2.439753821 | 6.846312085 | 9.347024178 | 1.43926E-14 | 2.67476E-13 | 22.66323741 |
| 223748_at | SLC4A11 | -2.438233475 | 6.977769842 | -9.353741169 | 1.39565E-14 | 2.5999E-13 | 22.69371753 |
| 229656_s_at | EML6 | -2.430981078 | 6.454346094 | -12.72207652 | 4.03914E-21 | 3.69298E-19 | 37.61872275 |
| 226248_s_at | KIAA1324 | -2.430750665 | 7.261808589 | -11.01053055 | 7.54947E-18 | 2.79843E-16 | 30.15032953 |
| 240460_at | LOC101929122 | -2.43026347 | 6.731369757 | -11.95744276 | 1.12659E-19 | 6.66628E-18 | 34.31955685 |
| 208637_x_at | ACTN1 | 2.429609456 | 8.596857396 | 15.02856246 | 2.68042E-25 | 9.31027E-23 | 47.14322327 |
| 230494_at | SLC20A1 | 2.428912729 | 6.560995051 | 9.083168827 | 4.82324E-14 | 8.05961E-13 | 21.4653668 |
| 228564_at | LINC01116 | 2.427192051 | 5.71249992 | 12.88853647 | 1.97416E-21 | 1.94481E-19 | 38.32814698 |
| 227297_at | ITGA9 | -2.425965482 | 9.377179709 | -10.65295211 | 3.77154E-17 | 1.18443E-15 | 28.55532824 |
| 209344_at | TPM4 | 2.425948089 | 6.767241016 | 13.85337912 | 3.3221E-23 | 5.95623E-21 | 42.37418148 |
| 235955_at | MARVELD2 | -2.425912424 | 5.649710687 | -13.05616001 | 9.63199E-22 | 1.04611E-19 | 39.03921928 |
| 218232_at | C1QA | 2.425244096 | 8.429910787 | 9.141684021 | 3.68824E-14 | 6.30367E-13 | 21.73108995 |
| 209031_at | CADM1 | -2.423107601 | 10.27795045 | -9.249933111 | 2.24558E-14 | 4.00072E-13 | 22.22256779 |
| 209360_s_at | LOC100506403 /// LOC101928269 /// RUNX1 | 2.422138327 | 7.057704316 | 13.27060016 | 3.86459E-22 | 4.68507E-20 | 39.94396734 |
| 219926_at | POPDC3 | 2.419950921 | 4.213353008 | 10.7275762 | 2.69379E-17 | 8.76684E-16 | 28.88901124 |
| 203560_at | GGH | 2.418502791 | 7.108116171 | 10.83476893 | 1.66245E-17 | 5.67381E-16 | 29.36758788 |
| 208394_x_at | ESM1 | 2.418224858 | 4.650525666 | 10.97750324 | 8.75494E-18 | 3.19757E-16 | 30.00343715 |
| 207924_x_at | PAX8 | -2.417009029 | 7.637330777 | -11.34287687 | 1.70923E-18 | 7.42864E-17 | 31.62324159 |
| 212327_at | LIMCH1 | -2.415836775 | 9.051453409 | -11.38483637 | 1.41795E-18 | 6.26729E-17 | 31.80849632 |
| 202580_x_at | FOXM1 | 2.414578128 | 5.184731059 | 11.4837846 | 9.13274E-19 | 4.2656E-17 | 32.24470972 |
| 228570_at | BTBD11 | -2.413173499 | 8.257237043 | -10.24583282 | 2.38187E-16 | 6.29733E-15 | 26.72807823 |
| 236179_at | CDH11 | 2.411900462 | 5.660189051 | 12.16145435 | 4.60675E-20 | 3.12887E-18 | 35.20610122 |
| 221676_s_at | CORO1C | 2.411656465 | 8.431621232 | 13.28981504 | 3.5619E-22 | 4.37633E-20 | 40.02476441 |
| 219978_s_at | NUSAP1 | 2.408879201 | 5.303337402 | 9.088743292 | 4.70151E-14 | 7.87546E-13 | 21.49068205 |
| 219454_at | EGFL6 | 2.408088699 | 4.684519233 | 10.18584831 | 3.12786E-16 | 8.04781E-15 | 26.45796665 |
| 202075_s_at | PLTP | 2.407891762 | 7.223507929 | 11.46036675 | 1.0134E-18 | 4.64831E-17 | 32.14155553 |
| 209906_at | C3AR1 | 2.406854228 | 7.722518964 | 10.43023407 | 1.03223E-16 | 2.94864E-15 | 27.55707379 |
| 235334_at | ST6GALNAC3 | -2.406611331 | 7.431804971 | -12.62274299 | 6.20124E-21 | 5.35628E-19 | 37.19384119 |
| 203895_at | PLCB4 | -2.406337726 | 7.817087624 | -9.066303615 | 5.21105E-14 | 8.64162E-13 | 21.3887759 |
| 204463_s_at | EDNRA | 2.405755829 | 6.204894166 | 9.626028639 | 4.01444E-15 | 8.18684E-14 | 23.92835169 |
| 204971_at | CSTA | 2.405356731 | 7.011088031 | 6.131906335 | 2.89007E-08 | 1.7563E-07 | 8.339528684 |
| 213007_at | FANCI | 2.403451761 | 5.556851253 | 9.028699134 | 6.19183E-14 | 1.00996E-12 | 21.21799579 |
| 214038_at | CCL8 | 2.400358353 | 7.528353128 | 7.791019186 | 1.78654E-11 | 1.85349E-10 | 15.61447308 |
| 203214_x_at | CDK1 | 2.398258548 | 6.585417455 | 9.63565087 | 3.84168E-15 | 7.87861E-14 | 23.97194188 |
| 205891_at | ADORA2B | 2.397680104 | 5.035415321 | 14.16243792 | 9.19649E-24 | 1.94138E-21 | 43.64562847 |
| 212657_s_at | IL1RN | 2.397624268 | 6.373184093 | 9.709844056 | 2.737E-15 | 5.77559E-14 | 24.30793958 |
| 235937_at | OCLN | -2.397332673 | 6.980926003 | -13.86136247 | 3.21322E-23 | 5.8173E-21 | 42.40717722 |
| 1554696_s_at | TYMS | 2.395083102 | 5.8154422 | 8.782372128 | 1.91643E-13 | 2.83923E-12 | 20.09934102 |
| 204924_at | TLR2 | 2.39419558 | 7.449359428 | 11.18736279 | 3.42089E-18 | 1.36126E-16 | 30.93523502 |
| 238454_at | ZNF540 | -2.392689547 | 6.11173017 | -14.93943236 | 3.83975E-25 | 1.24963E-22 | 46.78780336 |
| 219682_s_at | TBX3 | -2.391179237 | 8.645125596 | -10.74199345 | 2.52434E-17 | 8.24975E-16 | 28.95343027 |
| 209369_at | ANXA3 | -2.390756417 | 9.433220701 | -8.531968762 | 6.04188E-13 | 8.10451E-12 | 18.96289966 |
| 235201_at | FOXP2 | -2.389596884 | 7.826563134 | -11.28994168 | 2.16404E-18 | 9.0666E-17 | 31.38929738 |
| 201689_s_at | TPD52 | -2.388908684 | 9.173044108 | -11.32046261 | 1.88875E-18 | 8.08038E-17 | 31.52421424 |
| 201691_s_at | TPD52 | -2.386568554 | 6.138156079 | -13.91778737 | 2.53947E-23 | 4.85474E-21 | 42.6401549 |
| 227690_at | GABRB3 | -2.386002469 | 5.992412579 | -10.51059683 | 7.17504E-17 | 2.13204E-15 | 27.91766672 |
| 231179_at | IP6K3 | -2.385874507 | 5.973361228 | -10.86672951 | 1.43988E-17 | 5.0048E-16 | 29.51010716 |
| 228502_at | RPS6KA6 | -2.383419361 | 4.975422739 | -13.57387216 | 1.07222E-22 | 1.59738E-20 | 41.21390223 |
| 228241_at | AGR3 | -2.382392597 | 5.551180016 | -7.812138439 | 1.62278E-11 | 1.69453E-10 | 15.70943772 |
| 205054_at | NEB | -2.379005445 | 6.457651967 | -9.011574138 | 6.69773E-14 | 1.08439E-12 | 21.14022133 |
| 207172_s_at | CDH11 | 2.377947899 | 6.287661774 | 12.92805767 | 1.66637E-21 | 1.68097E-19 | 38.49610032 |
| 240574_at | DNAJC3-AS1 | -2.375893183 | 5.993135875 | -14.32521995 | 4.69801E-24 | 1.11694E-21 | 44.31039063 |
| 204470_at | CXCL1 | 2.375633486 | 4.925473856 | 9.329874727 | 1.55688E-14 | 2.8816E-13 | 22.5854132 |
| 238750_at | CCL28 | -2.37541648 | 7.529146636 | -14.02108076 | 1.65236E-23 | 3.30925E-21 | 43.06560469 |
| 222746_s_at | BSPRY | -2.374908717 | 7.736921821 | -13.05962347 | 9.49055E-22 | 1.03366E-19 | 39.05387613 |
| 216950_s_at | FCGR1A /// FCGR1B /// FCGR1C | 2.374268711 | 6.801724826 | 10.01577493 | 6.7802E-16 | 1.61388E-14 | 25.69103567 |
| 228323_at | CASC5 | 2.374027501 | 4.962990015 | 9.145163972 | 3.62986E-14 | 6.21166E-13 | 21.74689185 |
| 201242_s_at | ATP1B1 | -2.373817213 | 11.71902562 | -11.30368698 | 2.0354E-18 | 8.58021E-17 | 31.45006855 |
| 226599_at | FHDC1 | -2.373705731 | 8.621605106 | -15.86634186 | 9.60319E-27 | 5.42526E-24 | 50.43305374 |
| 204533_at | CXCL10 | 2.372865679 | 7.859067834 | 5.126523914 | 1.92476E-06 | 8.68501E-06 | 4.240160912 |
| 204092_s_at | AURKA | 2.371371753 | 6.28968707 | 10.37743577 | 1.31115E-16 | 3.66686E-15 | 27.31993218 |
| 233085_s_at | NABP1 | 2.367996987 | 5.836852589 | 8.77412472 | 1.99032E-13 | 2.93792E-12 | 20.06189379 |
| 227556_at | NME7 | -2.366726815 | 10.1528986 | -9.7723088 | 2.0577E-15 | 4.44859E-14 | 24.59066405 |
| 209709_s_at | HMMR | 2.366218963 | 5.911178056 | 8.368795809 | 1.27608E-12 | 1.60834E-11 | 18.22321204 |
| 219667_s_at | BANK1 | -2.365871437 | 7.807269895 | -8.74462398 | 2.27869E-13 | 3.32588E-12 | 19.92795304 |
| 205034_at | CCNE2 | 2.36528803 | 5.312190279 | 8.952060058 | 8.79977E-14 | 1.39054E-12 | 20.86993082 |
| 227506_at | SLC16A9 | -2.362188767 | 7.878690907 | -9.543300654 | 5.86043E-15 | 1.16813E-13 | 23.55345726 |
| 210038_at | PRKCQ | -2.361384853 | 8.390328845 | -16.50190595 | 8.15609E-28 | 6.96772E-25 | 52.86731528 |
| 205200_at | CLEC3B /// EXOSC7 | -2.358744556 | 8.771953467 | -10.18919621 | 3.08064E-16 | 7.94126E-15 | 26.47304781 |
| 200606_at | DSP | -2.353690748 | 10.75727875 | -8.280736268 | 1.90976E-12 | 2.33384E-11 | 17.82443208 |
| 221539_at | EIF4EBP1 | 2.352956133 | 6.703494103 | 15.6086489 | 2.64843E-26 | 1.34077E-23 | 49.43095358 |
| 220651_s_at | MCM10 | 2.352792766 | 4.237157549 | 9.937044719 | 9.70541E-16 | 2.239E-14 | 25.33550387 |
| 1555731_a_at | AP1S3 | -2.351889761 | 5.984819449 | -11.04064265 | 6.59619E-18 | 2.46343E-16 | 30.28417678 |
| 229779_at | COL4A4 | -2.349134685 | 7.343155062 | -10.17267033 | 3.3209E-16 | 8.47668E-15 | 26.3985982 |
| 225571_at | LIFR | -2.346805566 | 7.243238037 | -8.514475176 | 6.5463E-13 | 8.72335E-12 | 18.88355848 |
| 235609_at | BRIP1 | 2.343780831 | 4.566605117 | 10.06059414 | 5.52879E-16 | 1.33942E-14 | 25.89329325 |
| 223660_at | ADORA3 | 2.343118576 | 4.498872449 | 13.37987993 | 2.43168E-22 | 3.15052E-20 | 40.40287729 |
| 225647_s_at | CTSC | 2.341076612 | 7.879179973 | 9.897645183 | 1.1615E-15 | 2.6307E-14 | 25.1574715 |
| 208002_s_at | ACOT7 | 2.340010788 | 7.07963867 | 11.26744526 | 2.39246E-18 | 9.94737E-17 | 31.28979848 |
| 204199_at | RALGPS1 | -2.339304753 | 7.022412337 | -14.67725417 | 1.11177E-24 | 3.19927E-22 | 45.73631232 |
| 235867_at | GSTM3 | -2.336729778 | 7.618622568 | -12.98552511 | 1.30279E-21 | 1.35676E-19 | 38.73998883 |
| 222171_s_at | PKNOX2 | -2.336154958 | 6.037818997 | -15.89819067 | 8.47655E-27 | 4.87848E-24 | 50.55629931 |
| 230776_at | RNF157-AS1 | -2.334131176 | 6.377416488 | -13.88915782 | 2.86138E-23 | 5.28534E-21 | 42.52199425 |
| 202525_at | PRSS8 | -2.333822224 | 7.422746384 | -11.43284954 | 1.14525E-18 | 5.20938E-17 | 32.02027751 |
| 229376_at | PROX1 | -2.333401678 | 6.802454232 | -11.13238216 | 4.37421E-18 | 1.69018E-16 | 30.69148118 |
| 218966_at | MYO5C | -2.332533991 | 9.044653615 | -11.20667082 | 3.13816E-18 | 1.25976E-16 | 31.02077314 |
| 230351_at | FGF14-AS2 | -2.33251463 | 6.30170497 | -14.81009078 | 6.4805E-25 | 1.95758E-22 | 46.27018712 |
| 213447_at | IPW /// LOC101930404 /// PWARSN /// SNORD107 /// SNORD115-13 /// SNORD115-26 /// SNORD115-7 /// SNORD116-22 /// SNORD116-28 /// SNORD116-4 /// SNRPN | -2.332460476 | 8.252981856 | -12.91679322 | 1.74881E-21 | 1.75443E-19 | 38.4482486 |
| 231944_at | ERO1LB | -2.331777236 | 7.880122226 | -15.53743595 | 3.51065E-26 | 1.65755E-23 | 49.15248552 |
| 1552701_a_at | CARD16 | 2.331212499 | 6.517951155 | 9.888551386 | 1.21068E-15 | 2.72739E-14 | 25.11636977 |
| 207980_s_at | CITED2 | -2.329856539 | 9.202780886 | -11.17597016 | 3.59958E-18 | 1.42202E-16 | 30.88474814 |
| 219403_s_at | HPSE | 2.329515859 | 5.353072345 | 11.33066517 | 1.8048E-18 | 7.78213E-17 | 31.56929538 |
| 238081_at | WDFY3-AS2 | -2.327507161 | 6.16274096 | -11.26419848 | 2.42737E-18 | 1.00772E-16 | 31.2754346 |
| 220987_s_at | AKIP1 /// NUAK2 | -2.325512332 | 8.616736704 | -10.72696213 | 2.70126E-17 | 8.78591E-16 | 28.88626712 |
| 204170_s_at | CKS2 | 2.323291456 | 8.58247221 | 7.965266882 | 8.07515E-12 | 8.87633E-11 | 16.39902276 |
| 214612_x_at | MAGEA6 | 2.321907296 | 3.73267584 | 6.686545714 | 2.56106E-09 | 1.84682E-08 | 10.71937612 |
| 222680_s_at | DTL | 2.320094399 | 5.489072603 | 10.24516396 | 2.38912E-16 | 6.31343E-15 | 26.72506752 |
| 230372_at | HAS2 | 2.319859834 | 5.383623012 | 8.3080172 | 1.68556E-12 | 2.08078E-11 | 17.94793967 |
| 220168_at | CASC1 | -2.319818226 | 5.262523083 | -13.64880385 | 7.82449E-23 | 1.21191E-20 | 41.52591743 |
| 213906_at | MYBL1 | 2.319471879 | 5.001117247 | 6.269082943 | 1.59636E-08 | 1.01195E-07 | 8.921666185 |
| 204464_s_at | EDNRA | 2.319341965 | 8.310102699 | 12.12348643 | 5.43912E-20 | 3.60029E-18 | 35.04144648 |
| 213954_at | FAM169A | -2.317749949 | 6.473134983 | -11.14036503 | 4.22077E-18 | 1.64367E-16 | 30.72688919 |
| 218035_s_at | RBM47 | -2.316325329 | 10.7106837 | -12.5824482 | 7.38151E-21 | 6.25711E-19 | 37.02116302 |
| 227742_at | CLIC6 | -2.316284151 | 8.327016789 | -8.482725852 | 7.57167E-13 | 9.97544E-12 | 18.73958382 |
| 204438_at | MRC1 | 2.31577295 | 8.931963511 | 13.2956764 | 3.4744E-22 | 4.2881E-20 | 40.04940196 |
| 224975_at | NFIA | -2.315428033 | 9.40854015 | -12.05938787 | 7.20207E-20 | 4.54704E-18 | 34.76311977 |
| 201243_s_at | ATP1B1 | -2.314266422 | 11.15614715 | -12.21055916 | 3.71708E-20 | 2.58894E-18 | 35.41882144 |
| 202242_at | TSPAN7 | -2.313436219 | 7.708325261 | -10.4048527 | 1.15798E-16 | 3.26859E-15 | 27.44309686 |
| 203789_s_at | SEMA3C | 2.313247407 | 6.590226688 | 8.674514972 | 3.14288E-13 | 4.46911E-12 | 19.60969174 |
| 229084_at | CNTN4 | -2.31292833 | 7.048050925 | -9.079985693 | 4.89415E-14 | 8.16563E-13 | 21.45091118 |
| 224976_at | NFIA | -2.312916377 | 9.168979905 | -11.8798442 | 1.58484E-19 | 9.04503E-18 | 33.98119475 |
| 224998_at | CMTM4 | -2.312783692 | 9.155296843 | -12.2265441 | 3.46649E-20 | 2.42677E-18 | 35.48801097 |
| 203417_at | MFAP2 | 2.311633291 | 7.526911797 | 14.62479969 | 1.37672E-24 | 3.78253E-22 | 45.52486336 |
| 205316_at | SLC15A2 | -2.310673686 | 6.955115983 | -12.76473983 | 3.36103E-21 | 3.13591E-19 | 37.80085592 |
| 202007_at | NID1 | 2.310464781 | 7.539629435 | 11.83629024 | 1.91998E-19 | 1.06899E-17 | 33.79100807 |
| 221881_s_at | CLIC4 | 2.310410403 | 6.628671884 | 11.98947641 | 9.78722E-20 | 5.89335E-18 | 34.45905342 |
| 228973_at | DLG2 | -2.308508287 | 6.100766497 | -14.97584008 | 3.31502E-25 | 1.10517E-22 | 46.93311026 |
| 214745_at | PLCH1 | -2.308069909 | 7.122193491 | -15.95008952 | 6.9187E-27 | 4.18737E-24 | 50.75684702 |
| 206157_at | PTX3 | 2.304479204 | 6.829270139 | 7.419070902 | 9.65644E-11 | 8.82296E-10 | 13.94872511 |
| 206513_at | AIM2 | 2.303980818 | 6.627889034 | 6.601152297 | 3.73362E-09 | 2.6225E-08 | 10.34870832 |
| 202178_at | PRKCZ | -2.302593178 | 8.128558209 | -11.30480917 | 2.02524E-18 | 8.54398E-17 | 31.45502928 |
| 226926_at | DMKN | -2.299564235 | 7.41191899 | -10.57281983 | 5.41579E-17 | 1.65055E-15 | 28.19656258 |
| 215101_s_at | CXCL5 | 2.299258838 | 3.89126514 | 7.403043945 | 1.03818E-10 | 9.43678E-10 | 13.87727335 |
| 203358_s_at | EZH2 | 2.297684866 | 5.046834497 | 7.307739332 | 1.59613E-10 | 1.40756E-09 | 13.45301387 |
| 238992_at | POLI | -2.297035974 | 6.859394244 | -13.91232814 | 2.59791E-23 | 4.93197E-21 | 42.61763144 |
| 210119_at | KCNJ15 | -2.294076294 | 9.786909728 | -7.798727161 | 1.72495E-11 | 1.79334E-10 | 15.64912846 |
| 219522_at | FJX1 | 2.29373865 | 6.498457189 | 13.73804582 | 5.38127E-23 | 8.91811E-21 | 41.89660354 |
| 227828_s_at | EVA1A | 2.29216555 | 5.698685104 | 11.77845455 | 2.47773E-19 | 1.32513E-17 | 33.5381571 |
| 202341_s_at | TRIM2 | -2.291041783 | 8.688374118 | -11.03763946 | 6.68557E-18 | 2.49511E-16 | 30.27083115 |
| 212157_at | SDC2 | -2.290985177 | 9.742981525 | -13.51207951 | 1.39106E-22 | 1.98581E-20 | 40.95607146 |
| 220295_x_at | DEPDC1 | 2.290826831 | 4.277292541 | 10.76339378 | 2.29234E-17 | 7.59138E-16 | 29.04902195 |
| 230005_at | SVIP | -2.289374258 | 8.176164855 | -11.53057494 | 7.41983E-19 | 3.55547E-17 | 32.45066155 |
| 209942_x_at | MAGEA3 /// MAGEA6 | 2.289327846 | 3.95227522 | 6.678148495 | 2.65792E-09 | 1.91264E-08 | 10.6828642 |
| 233527_at | LOC101929340 | -2.28918118 | 6.099397399 | -13.18784406 | 5.49391E-22 | 6.41837E-20 | 39.59547006 |
| 227517_s_at | GAS5 /// SNORD44 /// SNORD47 /// SNORD74 /// SNORD76 /// SNORD77 /// SNORD79 /// SNORD80 /// SNORD81 | 2.28891969 | 7.150033267 | 8.888612373 | 1.17722E-13 | 1.8136E-12 | 20.58178103 |
| 227498_at | SOX6 | -2.288183671 | 6.523008046 | -11.39020186 | 1.38449E-18 | 6.12932E-17 | 31.83217361 |
| 1555745_a_at | LYZ | 2.288131673 | 6.466811166 | 5.01630579 | 2.99122E-06 | 1.30502E-05 | 3.812140758 |
| 227163_at | GSTO2 | -2.288093882 | 8.017857287 | -11.13887564 | 4.24898E-18 | 1.6523E-16 | 30.72028345 |
| 204726_at | CDH13 | 2.28778414 | 5.881347254 | 11.25046168 | 2.58083E-18 | 1.05936E-16 | 31.21465191 |
| 238692_at | BTBD11 | -2.286272139 | 6.397611554 | -9.95744238 | 8.84388E-16 | 2.05412E-14 | 25.42764498 |
| 210146_x_at | LILRB2 | 2.284780478 | 4.618153325 | 9.911260139 | 1.09159E-15 | 2.48885E-14 | 25.21900072 |
| 203418_at | CCNA2 | 2.283330634 | 5.084506374 | 8.64850734 | 3.54099E-13 | 4.9885E-12 | 19.49165114 |
| 219263_at | RNF128 | -2.281330862 | 9.621537984 | -7.033213603 | 5.47768E-10 | 4.4043E-09 | 12.2375749 |
| 236598_at | LOC100996579 | -2.279774305 | 6.585546088 | -12.484956 | 1.12602E-20 | 8.9096E-19 | 36.60260529 |
| 204122_at | TYROBP | 2.279319807 | 8.466007801 | 8.562717067 | 5.24755E-13 | 7.11758E-12 | 19.10237699 |
| 212843_at | NCAM1 | -2.277592845 | 8.747675706 | -8.005104199 | 6.73277E-12 | 7.48961E-11 | 16.57869707 |
| 220520_s_at | NUP62CL | -2.277563237 | 6.170270253 | -11.23966803 | 2.70821E-18 | 1.10832E-16 | 31.16688022 |
| 203435_s_at | MME | 2.277242131 | 6.574822425 | 12.3937168 | 1.67342E-20 | 1.25852E-18 | 36.2099185 |
| 212724_at | RND3 | 2.27690254 | 8.687851877 | 13.0987159 | 8.03192E-22 | 8.85373E-20 | 39.21920975 |
| 230508_at | DKK3 | 2.275710058 | 4.890862574 | 9.754204964 | 2.23502E-15 | 4.7884E-14 | 24.50873911 |
| 204174_at | ALOX5AP | 2.271072335 | 8.084286515 | 7.719020029 | 2.47884E-11 | 2.50536E-10 | 15.2910034 |
| 216733_s_at | GATM | -2.270654693 | 8.748407511 | -11.60686091 | 5.29077E-19 | 2.63454E-17 | 32.78598803 |
| 212594_at | MIR4680 /// PDCD4 | -2.270483712 | 8.478003605 | -11.79249753 | 2.32888E-19 | 1.25798E-17 | 33.59958268 |
| 1558199_at | FN1 | 2.270412777 | 4.459735951 | 12.0107941 | 8.9129E-20 | 5.4327E-18 | 34.55182543 |
| 203820_s_at | IGF2BP3 | 2.269850178 | 6.371457716 | 8.983250206 | 7.62682E-14 | 1.2225E-12 | 21.01158487 |
| 225524_at | ANTXR2 | 2.269261046 | 8.101367474 | 13.69293157 | 6.50153E-23 | 1.0455E-20 | 41.70933644 |
| 222872_x_at | NABP1 | 2.26910958 | 7.252544392 | 8.737150321 | 2.35816E-13 | 3.43453E-12 | 19.8940226 |
| 226492_at | SEMA6D | -2.267841399 | 7.541856509 | -8.218300808 | 2.5413E-12 | 3.04839E-11 | 17.54189881 |
| 201666_at | TIMP1 | 2.267216828 | 10.97129177 | 12.11912025 | 5.54406E-20 | 3.65206E-18 | 35.02250179 |
| 209156_s_at | COL6A2 | 2.265712673 | 8.318559646 | 10.78230054 | 2.10524E-17 | 7.0314E-16 | 29.1334461 |
| 202731_at | MIR4680 /// PDCD4 | -2.265630012 | 8.832484351 | -11.80465602 | 2.20729E-19 | 1.20322E-17 | 33.65274914 |
| 209924_at | CCL18 | 2.264409692 | 7.770005213 | 5.735850662 | 1.56383E-07 | 8.4355E-07 | 6.686694686 |
| 37117_at | ARHGAP8 /// PRR5-ARHGAP8 | -2.263849401 | 7.337230049 | -11.82496189 | 2.01827E-19 | 1.11463E-17 | 33.74150873 |
| 204007_at | FCGR3B | 2.262004222 | 6.32841445 | 10.14662128 | 3.73835E-16 | 9.38882E-15 | 26.28121511 |
| 213651_at | INPP5J | -2.261596688 | 8.499570405 | -14.39609237 | 3.51044E-24 | 8.68475E-22 | 44.59875028 |
| 240100_at | LOC100505920 | -2.259539057 | 6.585738037 | -9.259514078 | 2.14912E-14 | 3.8513E-13 | 22.26606025 |
| 243681_at | SHANK2 | -2.259445634 | 5.953054581 | -12.44183869 | 1.35771E-20 | 1.04841E-18 | 36.41714834 |
| 215440_s_at | BEX4 | -2.258624019 | 10.00105705 | -13.63263645 | 8.3744E-23 | 1.28615E-20 | 41.45865579 |
| 233375_at | EFCAB2 | -2.257230553 | 6.875660863 | -12.23155203 | 3.39153E-20 | 2.37838E-18 | 35.50968166 |
| 227194_at | FAM3B | -2.255855095 | 7.121407437 | -8.81628894 | 1.64033E-13 | 2.45443E-12 | 20.25334763 |
| 205883_at | ZBTB16 | -2.254614252 | 7.317400604 | -8.698129223 | 2.8203E-13 | 4.04618E-12 | 19.71688021 |
| 204513_s_at | ELMO1 | -2.252509064 | 8.465593824 | -13.47731683 | 1.61079E-22 | 2.24097E-20 | 40.81081519 |
| 230104_s_at | TPPP | -2.250841014 | 7.850700199 | -13.46288195 | 1.71201E-22 | 2.34597E-20 | 40.75045487 |
| 235583_at | ILDR1 | -2.250679936 | 6.819727291 | -14.89331604 | 4.62639E-25 | 1.47063E-22 | 46.60349963 |
| 231781_s_at | LRRC2 | -2.249115147 | 7.947528042 | -13.6605634 | 7.44748E-23 | 1.16674E-20 | 41.57482041 |
| 205269_at | LCP2 | 2.249015019 | 6.658896021 | 6.284523701 | 1.49281E-08 | 9.51162E-08 | 8.987476831 |
| 217427_s_at | HIRA | -2.247297199 | 9.879146707 | -13.68027359 | 6.85614E-23 | 1.08971E-20 | 41.65674789 |
| 211395_x_at | FCGR2C | 2.244662839 | 7.094613922 | 11.25314615 | 2.55009E-18 | 1.05069E-16 | 31.22653152 |
| 231358_at | MRO | -2.244526526 | 6.230681082 | -11.86491394 | 1.69253E-19 | 9.53027E-18 | 33.91602091 |
| 204779_s_at | HOXB7 | 2.243525882 | 4.881444608 | 9.870139458 | 1.31673E-15 | 2.94086E-14 | 25.03314098 |
| 210895_s_at | CD86 | 2.242942487 | 6.23095951 | 7.470354282 | 7.65768E-11 | 7.10114E-10 | 14.17755416 |
| 222077_s_at | RACGAP1 | 2.242786092 | 7.162161334 | 9.982083646 | 7.9047E-16 | 1.85489E-14 | 25.53892881 |
| 238441_at | PRKAA2 | -2.242166277 | 6.289434192 | -10.36999664 | 1.35611E-16 | 3.78486E-15 | 27.28650519 |
| 212070_at | GPR56 | -2.2420756 | 10.34836302 | -10.06876307 | 5.32702E-16 | 1.29562E-14 | 25.93014632 |
| 1552703_s_at | CARD16 /// CASP1 | 2.241843234 | 6.3786891 | 9.16483461 | 3.31685E-14 | 5.72259E-13 | 21.83621085 |
| 229402_at | SAMD13 | -2.241709313 | 6.845258538 | -11.61296162 | 5.14972E-19 | 2.57133E-17 | 32.81278011 |
| 229097_at | DIAPH3 | 2.240798862 | 6.450187492 | 12.78178056 | 3.12332E-21 | 2.94427E-19 | 37.87354483 |
| 204061_at | PRKX | -2.240132513 | 8.313221236 | -11.80101418 | 2.24302E-19 | 1.21906E-17 | 33.63682575 |
| 235800_at | RP11-539I5.1 | -2.238987142 | 5.821341941 | -14.91981263 | 4.15645E-25 | 1.3447E-22 | 46.70942714 |
| 204256_at | ELOVL6 | 2.238669847 | 5.862460833 | 12.68851536 | 4.66811E-21 | 4.18408E-19 | 37.47529857 |
| 226388_at | TCEA3 | -2.238666396 | 8.65515145 | -9.1301915 | 3.88778E-14 | 6.6188E-13 | 21.67890346 |
| 235821_at | WISP1 | 2.238460523 | 3.768887233 | 10.84017142 | 1.62254E-17 | 5.56189E-16 | 29.39168444 |
| 205414_s_at | ARHGAP44 | -2.237738462 | 6.894724439 | -12.47522364 | 1.17458E-20 | 9.21377E-19 | 36.56076267 |
| 213587_s_at | ATP6V0E2 | -2.236699169 | 8.997253314 | -11.95246311 | 1.15152E-19 | 6.79905E-18 | 34.29786235 |
| 226809_at | FAR2P2 /// FAR2P3 | -2.236583277 | 6.931651924 | -12.6187847 | 6.30823E-21 | 5.43154E-19 | 37.17688669 |
| 236783_at | KCNIP4 | -2.234082594 | 7.747810048 | -10.35461441 | 1.45404E-16 | 4.03347E-15 | 27.21737545 |
| 227909_at | LINC00086 /// LINC00087 | -2.228592031 | 7.529037118 | -11.1298623 | 4.4238E-18 | 1.70572E-16 | 30.68030319 |
| 210534_s_at | B9D1 | -2.228386381 | 7.819336025 | -13.12242755 | 7.25938E-22 | 8.1167E-20 | 39.31940376 |
| 206042_x_at | SNRPN /// SNURF | -2.228307308 | 10.0456094 | -13.88612004 | 2.89786E-23 | 5.3347E-21 | 42.50945054 |
| 228082_at | CLMP | 2.228270562 | 5.509248511 | 12.3575532 | 1.95845E-20 | 1.45289E-18 | 36.05401462 |
| 229635_at | LINC01094 | 2.22803768 | 4.559710392 | 11.14899094 | 4.06104E-18 | 1.5894E-16 | 30.76514321 |
| 222833_at | LPCAT2 | -2.226541874 | 7.344114162 | -14.54798775 | 1.88389E-24 | 5.02447E-22 | 45.21458213 |
| 228656_at | PROX1 | -2.226137126 | 7.351384159 | -10.93225191 | 1.07267E-17 | 3.83322E-16 | 29.80203107 |
| 223784_at | TMEM27 | -2.225193441 | 5.391790876 | -11.39713732 | 1.34242E-18 | 5.97206E-17 | 31.86277506 |
| 204222_s_at | GLIPR1 | 2.224942497 | 7.289773674 | 8.695871898 | 2.84965E-13 | 4.08186E-12 | 19.70663348 |
| 1568765_at | SERPINE1 | 2.224277964 | 4.426687878 | 11.70791146 | 3.38333E-19 | 1.75008E-17 | 33.22929196 |
| 207277_at | CD209 | 2.221999931 | 6.548572378 | 15.09473554 | 2.05396E-25 | 7.58786E-23 | 47.4064259 |
| 227525_at | GLCCI1 | -2.221972919 | 9.880054278 | -12.20088914 | 3.87744E-20 | 2.69376E-18 | 35.37695201 |
| 242523_at | LINC00938 | -2.221776923 | 6.297523242 | -14.90419464 | 4.42729E-25 | 1.41557E-22 | 46.647001 |
| 201743_at | CD14 | 2.221718448 | 9.044389516 | 11.26954454 | 2.37016E-18 | 9.86966E-17 | 31.29908526 |
| 236234_at | PDE1A | -2.218466444 | 6.383835911 | -10.90738474 | 1.19943E-17 | 4.22271E-16 | 29.69128032 |
| 209172_s_at | CENPF | 2.216051262 | 4.874228894 | 12.02745675 | 8.28453E-20 | 5.12975E-18 | 34.62430582 |
| 228232_s_at | VSIG2 | -2.215860995 | 7.367209364 | -13.94209025 | 2.29498E-23 | 4.43385E-21 | 42.74037677 |
| 205786_s_at | ITGAM | 2.214748005 | 6.59295842 | 9.302238719 | 1.76702E-14 | 3.23332E-13 | 22.45998922 |
| 226644_at | MIB2 | -2.214559788 | 7.715713343 | -13.30067896 | 3.40144E-22 | 4.21709E-20 | 40.07042635 |
| 219274_at | TSPAN12 | -2.213825313 | 8.248335691 | -9.941114095 | 9.52706E-16 | 2.19971E-14 | 25.35388779 |
| 227399_at | VGLL3 | 2.213721879 | 5.890497349 | 11.04275622 | 6.53401E-18 | 2.44355E-16 | 30.29356865 |
| 207169_x_at | DDR1 /// MIR4640 | -2.212197986 | 9.533379842 | -10.70309876 | 3.00804E-17 | 9.68578E-16 | 28.77960557 |
| 213435_at | SATB2 | 2.211638589 | 5.496456286 | 12.05948245 | 7.19909E-20 | 4.54704E-18 | 34.7635308 |
| 226344_at | ZMAT1 | -2.211390252 | 7.106346393 | -9.261597192 | 2.1287E-14 | 3.81972E-13 | 22.27551629 |
| 214680_at | NTRK2 | -2.209753201 | 7.305029779 | -9.633956648 | 3.87155E-15 | 7.92941E-14 | 23.96426702 |
| 229170_s_at | TTC18 | -2.209491043 | 5.937222607 | -12.81322497 | 2.72818E-21 | 2.61232E-19 | 38.00758479 |
| 224901_at | SCD5 | -2.208635786 | 9.217066342 | -10.11176349 | 4.38047E-16 | 1.08667E-14 | 26.12407911 |
| 208454_s_at | CPQ | -2.207332639 | 10.36854924 | -15.41562937 | 5.69375E-26 | 2.57277E-23 | 48.67463324 |
| 203184_at | FBN2 | 2.206642701 | 5.828399854 | 7.021716379 | 5.76679E-10 | 4.61571E-09 | 12.18690742 |
| 225305_at | SLC25A29 | -2.206580319 | 9.072548662 | -13.57919519 | 1.04847E-22 | 1.57055E-20 | 41.23609043 |
| 229223_at | RP11-96D1.11 | -2.205372372 | 6.189531469 | -12.19397302 | 3.99639E-20 | 2.76585E-18 | 35.34700024 |
| 208636_at | ACTN1 | 2.204362398 | 10.14550559 | 15.05001988 | 2.4586E-25 | 8.78587E-23 | 47.22863274 |
| 209283_at | CRYAB | -2.204236812 | 10.00201499 | -8.228456297 | 2.42593E-12 | 2.9164E-11 | 17.58784187 |
| 224356_x_at | MS4A6A | 2.202673599 | 8.619352785 | 8.387803185 | 1.16969E-12 | 1.48774E-11 | 18.30932829 |
| 242028_at | ZNF709 | -2.200762688 | 7.212640148 | -15.81223202 | 1.18747E-26 | 6.55805E-24 | 50.22335888 |
| 213283_s_at | SALL2 | -2.200736707 | 8.296551012 | -13.13281134 | 6.94505E-22 | 7.87802E-20 | 39.36325927 |
| 121_at | PAX8 | -2.200685221 | 11.15866733 | -12.50748194 | 1.02125E-20 | 8.23549E-19 | 36.69941069 |
| 213226_at | CCNA2 | 2.200173857 | 5.720237963 | 8.96041492 | 8.46893E-14 | 1.34526E-12 | 20.90787543 |
| 205249_at | EGR2 | -2.199078153 | 9.65087498 | -7.256986748 | 2.00618E-10 | 1.73804E-09 | 13.22754154 |
| 203213_at | CDK1 | 2.198870806 | 7.732058808 | 8.608626583 | 4.25152E-13 | 5.88783E-12 | 19.3106712 |
| 205393_s_at | CHEK1 | 2.197415192 | 4.271407465 | 9.147955271 | 3.58371E-14 | 6.14037E-13 | 21.75956661 |
| 209243_s_at | PEG3 | -2.196717853 | 5.796590464 | -8.94895987 | 8.92579E-14 | 1.40923E-12 | 20.85585096 |
| 202638_s_at | ICAM1 | 2.195968821 | 6.617958279 | 8.570767475 | 5.05741E-13 | 6.90077E-12 | 19.13889848 |
| 242979_at | IRS1 | -2.195416852 | 7.55341634 | -11.32935126 | 1.8154E-18 | 7.80321E-17 | 31.56349027 |
| 244780_at | SGPP2 | -2.193823304 | 6.835381199 | -6.786263955 | 1.64654E-09 | 1.22416E-08 | 11.15395877 |
| 211160_x_at | ACTN1 | 2.193645404 | 8.095662106 | 14.94670667 | 3.7286E-25 | 1.22073E-22 | 46.81684971 |
| 215076_s_at | COL3A1 | 2.192020299 | 11.62602026 | 13.10058181 | 7.96824E-22 | 8.80128E-20 | 39.22709665 |
| 229201_at | PAK3 | -2.191516843 | 6.247917453 | -9.38163451 | 1.22828E-14 | 2.30618E-13 | 22.82028087 |
| 238542_at | ULBP2 | 2.191026022 | 5.562527314 | 12.56825156 | 7.84915E-21 | 6.57201E-19 | 36.96028084 |
| 241873_at | RP11-710C12.1 | -2.189313099 | 6.102916419 | -11.00050985 | 7.89646E-18 | 2.91913E-16 | 30.10577101 |
| 222043_at | CLU | -2.187905605 | 8.06679465 | -7.459523777 | 8.04225E-11 | 7.43884E-10 | 14.12920336 |
| 204777_s_at | MAL | -2.187223051 | 8.270122915 | -11.74799886 | 2.83424E-19 | 1.49714E-17 | 33.40487174 |
| 230729_at | RP11-355B11.2 | -2.186588384 | 6.472963605 | -14.15871019 | 9.3394E-24 | 1.95644E-21 | 43.63036547 |
| 209644_x_at | CDKN2A | 2.185126768 | 6.080615431 | 9.252620469 | 2.2181E-14 | 3.96063E-13 | 22.2347671 |
| 202800_at | SLC1A3 | 2.183989912 | 6.78735818 | 9.03173152 | 6.10632E-14 | 9.97201E-13 | 21.23176752 |
| 211368_s_at | CASP1 | 2.18289387 | 6.990718223 | 7.684040218 | 2.90597E-11 | 2.89935E-10 | 15.13401362 |
| 232049_at | SNX2 | -2.181903381 | 5.035433203 | -13.44688908 | 1.83165E-22 | 2.485E-20 | 40.68354965 |
| 236044_at | PPAPDC1A | 2.181287526 | 5.146703321 | 8.973650519 | 7.97012E-14 | 1.27157E-12 | 20.96798662 |
| 202465_at | PCOLCE | 2.179870329 | 8.480376912 | 12.07092805 | 6.84686E-20 | 4.36308E-18 | 34.81326165 |
| 228293_at | DEPDC7 | 2.176183723 | 4.042226014 | 9.534988507 | 6.08757E-15 | 1.20812E-13 | 23.51577782 |
| 1554079_at | GALNT18 | -2.174469024 | 8.581016232 | -13.80252134 | 4.10861E-23 | 7.19994E-21 | 42.16379384 |
| 210992_x_at | FCGR2C | 2.173346273 | 6.260554197 | 12.30548701 | 2.45679E-20 | 1.78991E-18 | 35.829298 |
| 212473_s_at | MICAL2 | 2.172771416 | 9.100529561 | 12.71456583 | 4.17205E-21 | 3.80178E-19 | 37.58663705 |
| 204444_at | KIF11 | 2.172381867 | 5.386057834 | 7.550898298 | 5.31728E-11 | 5.06749E-10 | 14.53752577 |
| 213307_at | SHANK2 | -2.172284033 | 6.699014178 | -11.96791045 | 1.07595E-19 | 6.39432E-18 | 34.36515222 |
| 214930_at | SLITRK5 | -2.171944459 | 6.616172186 | -7.43182217 | 9.11558E-11 | 8.36794E-10 | 14.00559419 |
| 231334_at | LOC101929480 | -2.170861114 | 6.218209723 | -10.96349973 | 9.32275E-18 | 3.38012E-16 | 29.94112783 |
| 231879_at | COL12A1 | 2.16926824 | 5.301264971 | 12.64359593 | 5.66698E-21 | 4.92594E-19 | 37.28313051 |
| 220088_at | C5AR1 | 2.168836735 | 6.53573033 | 10.26485763 | 2.18479E-16 | 5.82414E-15 | 26.8137033 |
| 204519_s_at | PLLP | -2.168033727 | 7.456481754 | -13.37017565 | 2.53366E-22 | 3.25947E-20 | 40.3621844 |
| 209032_s_at | CADM1 | -2.167970784 | 8.867557867 | -8.434180121 | 9.45802E-13 | 1.22511E-11 | 18.51950258 |
| 213540_at | HSD17B8 | -2.167960425 | 8.77135514 | -17.19709128 | 5.82724E-29 | 8.38433E-26 | 55.46948128 |
| 204085_s_at | CLN5 | -2.164461794 | 9.24189445 | -13.22714737 | 4.64813E-22 | 5.52471E-20 | 39.76108563 |
| 212021_s_at | MKI67 | 2.162791543 | 6.192217596 | 11.09902425 | 5.07844E-18 | 1.93359E-16 | 30.54346242 |
| 230425_at | EPHB1 | -2.161111739 | 7.45322485 | -8.113337588 | 4.10672E-12 | 4.74704E-11 | 17.0673606 |
| 1558077_s_at | MDH1B | -2.160482527 | 5.898769947 | -13.93125939 | 2.40087E-23 | 4.6221E-21 | 42.69572101 |
| 206858_s_at | HOXC6 | 2.158103178 | 6.016895314 | 11.36336014 | 1.56021E-18 | 6.84076E-17 | 31.71369727 |
| 204083_s_at | TPM2 | 2.158101313 | 7.644539526 | 12.37536384 | 1.81244E-20 | 1.35191E-18 | 36.13081581 |
| 209933_s_at | CD300A | 2.157684178 | 6.934569467 | 9.061283439 | 5.33241E-14 | 8.82413E-13 | 21.36597721 |
| 223280_x_at | MS4A6A | 2.156970414 | 8.636430164 | 8.255760519 | 2.14102E-12 | 2.59845E-11 | 17.71138978 |
| 219257_s_at | SPHK1 | 2.156839376 | 6.726603544 | 14.10072974 | 1.18735E-23 | 2.45904E-21 | 43.39273851 |
| 209891_at | SPC25 | 2.156373514 | 4.045974518 | 9.301695917 | 1.77142E-14 | 3.2392E-13 | 22.45752561 |
| 224428_s_at | CDCA7 | 2.155925233 | 6.016543691 | 5.202939118 | 1.41425E-06 | 6.52468E-06 | 4.539705098 |
| 1565162_s_at | MGST1 | -2.154369412 | 10.5105993 | -7.89394885 | 1.11789E-11 | 1.19774E-10 | 16.07763853 |
| 226864_at | PKIA | -2.154295321 | 7.863777509 | -9.589076592 | 4.75336E-15 | 9.60067E-14 | 23.76092471 |
| 203878_s_at | MMP11 | 2.153215281 | 5.588931097 | 12.06658311 | 6.97849E-20 | 4.43661E-18 | 34.79438464 |
| 215945_s_at | TRIM2 | -2.151045219 | 7.166437625 | -12.31877381 | 2.31862E-20 | 1.70162E-18 | 35.88667214 |
| 227499_at | FZD3 | -2.150989827 | 6.341220977 | -11.7398842 | 2.93764E-19 | 1.5429E-17 | 33.36934319 |
| 229839_at | SCARA5 | -2.150545439 | 6.655738873 | -6.766056248 | 1.80097E-09 | 1.33101E-08 | 11.06574525 |
| 202437_s_at | CYP1B1 | 2.149952439 | 6.81706128 | 6.507616477 | 5.63381E-09 | 3.84411E-08 | 9.944356047 |
| 232304_at | AK026714 /// PELI1 | 2.147851223 | 4.982832393 | 7.749039014 | 2.16255E-11 | 2.21004E-10 | 15.42581537 |
| 1552827_s_at | SLC26A7 | -2.147053456 | 6.12790092 | -10.79825827 | 1.9593E-17 | 6.58015E-16 | 29.2046806 |
| 49452_at | ACACB | -2.146054133 | 7.42500872 | -9.449178599 | 9.01545E-15 | 1.73136E-13 | 23.1266832 |
| 210732_s_at | LGALS8 | 2.145949713 | 4.715509644 | 12.01899971 | 8.59769E-20 | 5.25815E-18 | 34.58752245 |
| 201688_s_at | TPD52 | -2.14583029 | 8.267856528 | -9.442286103 | 9.30444E-15 | 1.78373E-13 | 23.09542157 |
| 201522_x_at | SNRPN /// SNURF | -2.143506402 | 11.55931856 | -13.65087254 | 7.7568E-23 | 1.20484E-20 | 41.53452147 |
| 210096_at | CYP4B1 | -2.138176739 | 6.701469744 | -6.68322226 | 2.59897E-09 | 1.87243E-08 | 10.70492383 |
| 204774_at | EVI2A | 2.13776687 | 7.261686121 | 5.63355047 | 2.40252E-07 | 1.25401E-06 | 6.267204577 |
| 222496_s_at | RBM47 | -2.136203317 | 9.442069739 | -12.12900618 | 5.3093E-20 | 3.53146E-18 | 35.06539355 |
| 209270_at | LAMB3 | 2.135261761 | 6.118547069 | 7.933279472 | 9.34372E-12 | 1.01564E-10 | 16.25483146 |
| 225525_at | KIAA1671 | -2.13488819 | 9.448553118 | -13.60621042 | 9.35831E-23 | 1.42129E-20 | 41.3486446 |
| 225009_at | CMTM4 | -2.134307403 | 9.50698881 | -10.64555139 | 3.89962E-17 | 1.22115E-15 | 28.52221337 |
| 203892_at | WFDC2 | -2.134301605 | 9.158113871 | -8.800008111 | 1.76751E-13 | 2.63177E-12 | 20.17941951 |
| 220994_s_at | STXBP6 | -2.134060859 | 7.550492021 | -9.276182358 | 1.99108E-14 | 3.59519E-13 | 22.34172189 |
| 213317_at | CLIC5 | -2.133837938 | 7.067622476 | -8.130216057 | 3.80182E-12 | 4.41889E-11 | 17.14362794 |
| 230615_at | DUOXA2 | -2.130388788 | 7.061965588 | -12.80901486 | 2.77802E-21 | 2.65076E-19 | 37.98964478 |
| 213071_at | DPT | -2.129510495 | 8.003474 | -8.584538008 | 4.74799E-13 | 6.51433E-12 | 19.20137361 |
| 229816_at | WDR78 | -2.129343054 | 5.910901325 | -13.23421531 | 4.51056E-22 | 5.37288E-20 | 39.79084845 |
| 203922_s_at | CYBB | 2.128989579 | 6.098960147 | 8.08066688 | 4.76793E-12 | 5.44117E-11 | 16.91978066 |
| 1553998_at | DMRTC1 /// DMRTC1B | -2.128769823 | 7.290949512 | -18.61370672 | 3.24063E-31 | 9.84341E-28 | 60.57983048 |
| 201690_s_at | TPD52 | -2.127510739 | 10.25449583 | -11.60627235 | 5.30458E-19 | 2.63902E-17 | 32.78340308 |
| 239082_at | FZD3 | -2.127415727 | 8.230485095 | -10.49060332 | 7.85421E-17 | 2.30876E-15 | 27.82799516 |
| 225464_at | FRMD6 | 2.126982035 | 8.603652475 | 14.96440654 | 3.47152E-25 | 1.15033E-22 | 46.88749653 |
| 219787_s_at | ECT2 | 2.124830706 | 6.573440789 | 9.989555426 | 7.64018E-16 | 1.79984E-14 | 25.57266669 |
| 223767_at | GPR84 | 2.118815906 | 4.593960906 | 12.14165539 | 5.02344E-20 | 3.37416E-18 | 35.12025888 |
| 201858_s_at | SRGN | 2.117715644 | 10.03003979 | 6.850211854 | 1.2393E-09 | 9.3927E-09 | 11.43358696 |
| 228890_at | ATOH8 | -2.116821367 | 7.653710466 | -10.69454285 | 3.12636E-17 | 1.00137E-15 | 28.74135302 |
| 224480_s_at | AGPAT9 | -2.11587246 | 7.725834282 | -9.138797312 | 3.73737E-14 | 6.38459E-13 | 21.71798178 |
| 216228_s_at | WDHD1 | 2.115670962 | 4.095506282 | 10.97642219 | 8.79751E-18 | 3.21098E-16 | 29.99862754 |
| 238727_at | LOC440934 | -2.11499527 | 5.765194403 | -9.612667824 | 4.2673E-15 | 8.67018E-14 | 23.86782 |
| 1555123_at | ST6GAL2 | -2.114821494 | 6.14312246 | -9.974654696 | 8.1768E-16 | 1.9171E-14 | 25.50538161 |
| 223636_at | ZMYND12 | -2.114525759 | 6.133512023 | -13.50726831 | 1.41957E-22 | 2.02123E-20 | 40.93597675 |
| 213618_at | ARAP2 /// LOC101928667 | -2.111068183 | 8.808045797 | -11.23354128 | 2.7833E-18 | 1.1348E-16 | 31.13975917 |
| 218585_s_at | DTL | 2.110304281 | 6.226966112 | 9.306210513 | 1.73515E-14 | 3.17714E-13 | 22.47801577 |
| 208018_s_at | HCK | 2.109703963 | 6.497182479 | 8.302545985 | 1.72831E-12 | 2.13115E-11 | 17.92316752 |
| 214857_at | RPARP-AS1 | -2.10816895 | 6.957482103 | -12.29638604 | 2.55617E-20 | 1.85356E-18 | 35.78998759 |
| 219555_s_at | CENPN | 2.105101659 | 6.469451272 | 11.08908629 | 5.30948E-18 | 2.01315E-16 | 30.49934627 |
| 218885_s_at | GALNT12 | -2.103634369 | 8.17240281 | -10.277064 | 2.06703E-16 | 5.53453E-15 | 26.86862913 |
| 221874_at | KIAA1324 | -2.102447544 | 6.050288731 | -9.928482441 | 1.00917E-15 | 2.31735E-14 | 25.29682014 |
| 228956_at | UGT8 | -2.102289918 | 5.707181094 | -8.136541771 | 3.69346E-12 | 4.30576E-11 | 17.17221553 |
| 206571_s_at | MAP4K4 | 2.102269151 | 7.460061505 | 12.35392954 | 1.98958E-20 | 1.47199E-18 | 36.03838473 |
| 202208_s_at | ARL4C | 2.10225894 | 7.295318387 | 10.64397367 | 3.92749E-17 | 1.22636E-15 | 28.51515327 |
| 216347_s_at | PPP1R13B | -2.100762663 | 7.222646307 | -14.2147604 | 7.40802E-24 | 1.6332E-21 | 43.85967207 |
| 202761_s_at | SYNE2 | -2.100472575 | 9.364860357 | -12.83188435 | 2.5179E-21 | 2.43226E-19 | 38.08707038 |
| 1557776_at | LOC101928303 | -2.100263376 | 6.613853287 | -13.1382228 | 6.7867E-22 | 7.74661E-20 | 39.38610919 |
| 225706_at | GLCCI1 | -2.099744594 | 9.709166213 | -12.3059124 | 2.45224E-20 | 1.78991E-18 | 35.83113521 |
| 244779_at | ZDHHC2 | -2.098897306 | 7.856704749 | -12.87465574 | 2.09534E-21 | 2.0531E-19 | 38.26911414 |
| 238472_at | FBXO9 | -2.098815245 | 6.905163413 | -12.81683688 | 2.68614E-21 | 2.57658E-19 | 38.02297404 |
| 238835_at | AVPR1A | -2.095546951 | 7.684770458 | -7.5649825 | 4.98842E-11 | 4.78075E-10 | 14.60054156 |
| 230391_at | CD84 | 2.094688711 | 7.564165745 | 6.053513932 | 4.04936E-08 | 2.40207E-07 | 8.00897472 |
| 203819_s_at | IGF2BP3 | 2.094162766 | 5.476245398 | 9.507700698 | 6.89709E-15 | 1.35403E-13 | 23.39206652 |
| 217388_s_at | KYNU | 2.094089994 | 5.857304374 | 6.03744876 | 4.33838E-08 | 2.56267E-07 | 7.941431078 |
| 1552487_a_at | BNC1 | 2.093984425 | 3.517105816 | 7.146070538 | 3.30317E-10 | 2.75684E-09 | 12.73596999 |
| 1560652_at | RP6-24A23.7 | -2.09350496 | 6.015501449 | -10.99789174 | 7.98973E-18 | 2.94763E-16 | 30.09412785 |
| 214511_x_at | FCGR1B | 2.09268179 | 6.6117921 | 8.79198058 | 1.83381E-13 | 2.72736E-12 | 20.14296904 |
| 203923_s_at | CYBB | 2.092578453 | 7.228733966 | 7.05578855 | 4.95124E-10 | 4.01229E-09 | 12.33711943 |
| 225306_s_at | SLC25A29 | -2.092379905 | 9.238452706 | -13.5950005 | 9.81011E-23 | 1.4776E-20 | 41.30195151 |
| 221207_s_at | NBEA | -2.0918585 | 7.540478181 | -9.987847691 | 7.69984E-16 | 1.80993E-14 | 25.56495587 |
| 238428_at | KCNJ15 | -2.09041965 | 6.84199 | -10.08534293 | 4.93991E-16 | 1.20954E-14 | 26.00493352 |
| 219519_s_at | SIGLEC1 | 2.090070089 | 5.810755194 | 10.54984998 | 6.0082E-17 | 1.81792E-15 | 28.0936385 |
| 223343_at | MS4A7 | 2.089958457 | 7.895379607 | 9.32905638 | 1.56273E-14 | 2.89145E-13 | 22.5816994 |
| 235155_at | BDH2 | -2.089936093 | 6.028985632 | -13.42576611 | 2.00267E-22 | 2.68373E-20 | 40.59513445 |
| 228528_at | MIR29B2 /// MIR29C | -2.088021006 | 6.995122237 | -10.67940491 | 3.34725E-17 | 1.06216E-15 | 28.67365964 |
| 210039_s_at | PRKCQ | -2.087525908 | 7.700445563 | -16.26250417 | 2.05241E-27 | 1.42045E-24 | 51.95660698 |
| 218677_at | S100A14 | -2.086867055 | 8.128701866 | -8.300950305 | 1.74098E-12 | 2.14532E-11 | 17.91594296 |
| 226420_at | MECOM | 2.086284244 | 5.947404808 | 9.934150642 | 9.83428E-16 | 2.26491E-14 | 25.32242903 |
| 239010_at | DUXAP10 | 2.086214951 | 3.464769789 | 9.622434107 | 4.08095E-15 | 8.31009E-14 | 23.91206711 |
| 207557_s_at | RYR2 | -2.085923752 | 5.745281741 | -11.70388892 | 3.44402E-19 | 1.77643E-17 | 33.21166465 |
| 212865_s_at | COL14A1 | -2.085193534 | 8.236567322 | -7.264925099 | 1.93574E-10 | 1.68181E-09 | 13.26278652 |
| 224970_at | NFIA | -2.083017651 | 10.3082919 | -11.50739971 | 8.2236E-19 | 3.89961E-17 | 32.34867992 |
| 206067_s_at | WT1 | 2.082401389 | 4.000120467 | 12.56735698 | 7.8796E-21 | 6.58742E-19 | 36.95644364 |
| 202403_s_at | COL1A2 | 2.08180254 | 11.5738968 | 14.47318823 | 2.55863E-24 | 6.62477E-22 | 44.91169449 |
| 218918_at | MAN1C1 | -2.081472181 | 8.215483416 | -11.48513442 | 9.07815E-19 | 4.24592E-17 | 32.25065399 |
| 209395_at | CHI3L1 | 2.080101694 | 6.323673986 | 4.157173522 | 7.85926E-05 | 0.000264694 | 0.660968593 |
| 213423_x_at | TUSC3 | 2.079052535 | 7.308204104 | 8.550662706 | 5.54569E-13 | 7.49779E-12 | 19.04769426 |
| 209737_at | MAGI2 | -2.078126801 | 8.012358754 | -9.997123606 | 7.38129E-16 | 1.7448E-14 | 25.60683705 |
| 204019_s_at | SH3YL1 | -2.077138395 | 9.990097387 | -12.13339293 | 5.20836E-20 | 3.47277E-18 | 35.08442281 |
| 232898_at | DAB2 | 2.076570207 | 5.095952539 | 14.31533842 | 4.89306E-24 | 1.15199E-21 | 44.27013407 |
| 206715_at | TFEC | 2.07611954 | 5.002516115 | 6.004625276 | 4.99364E-08 | 2.92164E-07 | 7.803642928 |
| 203178_at | GATM | -2.075275155 | 8.690871213 | -10.58810189 | 5.05449E-17 | 1.5456E-15 | 28.26501837 |
| 236489_at | GPR110 | -2.074081409 | 5.14312909 | -9.176001392 | 3.15133E-14 | 5.46475E-13 | 21.88691438 |
| 229947_at | PI15 | 2.072728514 | 5.068932133 | 7.855692151 | 1.33081E-11 | 1.41011E-10 | 15.90539376 |
| 203967_at | CDC6 | 2.072507021 | 4.400315399 | 10.59294063 | 4.94521E-17 | 1.51558E-15 | 28.28669001 |
| 204959_at | MNDA | 2.071199479 | 7.33656671 | 6.670518703 | 2.74908E-09 | 1.972E-08 | 10.64970071 |
| 202464_s_at | PFKFB3 | 2.071129478 | 7.290513895 | 9.291378361 | 1.85716E-14 | 3.37793E-13 | 22.41069651 |
| 1554018_at | GPNMB | 2.068801662 | 5.320838063 | 8.078439943 | 4.81668E-12 | 5.49223E-11 | 16.90972343 |
| 222705_s_at | SLC25A15 | -2.068683466 | 6.452861662 | -8.766252068 | 2.0635E-13 | 3.03547E-12 | 20.02614889 |
| 219973_at | ARSJ | 2.065876463 | 4.57301788 | 9.990492747 | 7.60763E-16 | 1.79442E-14 | 25.57689885 |
| 228176_at | S1PR3 | 2.062842575 | 7.251226501 | 8.253466625 | 2.16361E-12 | 2.62296E-11 | 17.70100887 |
| 205226_at | PDGFRL | -2.062764383 | 8.971361089 | -10.53072424 | 6.55081E-17 | 1.95933E-15 | 28.00791115 |
| 219959_at | MOCOS | 2.061843453 | 5.395512338 | 12.1205196 | 5.5102E-20 | 3.63414E-18 | 35.02857371 |
| 205668_at | LY75 | -2.061703323 | 9.32165675 | -10.25856261 | 2.24812E-16 | 5.97549E-15 | 26.78537366 |
| 1558680_s_at | PDE1A | -2.0608138 | 6.898202574 | -8.791657669 | 1.83652E-13 | 2.72933E-12 | 20.14150281 |
| 1554588_a_at | TTC30B | -2.060635578 | 6.419230816 | -12.00534619 | 9.12858E-20 | 5.54561E-18 | 34.52812135 |
| 235651_at | TTC22 | -2.060068441 | 6.449591972 | -10.44762351 | 9.54069E-17 | 2.74691E-15 | 27.63513795 |
| 230900_at | CCDC110 | -2.060064975 | 5.214129644 | -12.30904001 | 2.41905E-20 | 1.77057E-18 | 35.84464226 |
| 1554768_a_at | MAD2L1 | 2.059283384 | 5.675754434 | 8.033825933 | 5.90534E-12 | 6.62715E-11 | 16.70830244 |
| 212325_at | LIMCH1 | -2.058838311 | 7.459032117 | -9.434295702 | 9.65109E-15 | 1.8463E-13 | 23.05917879 |
| 204918_s_at | MLLT3 | -2.058548696 | 6.446848331 | -12.48285738 | 1.13632E-20 | 8.97808E-19 | 36.59358355 |
| 205980_s_at | ARHGAP8 /// PRR5-ARHGAP8 | -2.057664416 | 6.590265868 | -11.21358959 | 3.04266E-18 | 1.22592E-16 | 31.05141655 |
| 212991_at | FBXO9 | -2.056858303 | 7.005211102 | -12.93647925 | 1.60729E-21 | 1.63712E-19 | 38.5318656 |
| 205119_s_at | FPR1 | 2.056307481 | 7.09625624 | 9.251404784 | 2.23049E-14 | 3.97825E-13 | 22.22924849 |
| 218312_s_at | ZSCAN18 | -2.055855299 | 8.981419065 | -11.12374053 | 4.54664E-18 | 1.74447E-16 | 30.65314496 |
| 211071_s_at | MLLT11 | 2.055544191 | 7.42757525 | 8.299559489 | 1.7521E-12 | 2.15708E-11 | 17.90964603 |
| 212841_s_at | PPFIBP2 | -2.054820608 | 8.648093768 | -11.73043232 | 3.06288E-19 | 1.60251E-17 | 33.32795148 |
| 213865_at | DCBLD2 | 2.054155031 | 5.991417493 | 9.577152142 | 5.01978E-15 | 1.01208E-13 | 23.70688651 |
| 221724_s_at | CLEC4A | 2.052485593 | 5.815804346 | 8.82081953 | 1.60659E-13 | 2.40791E-12 | 20.27392063 |
| 63305_at | PKNOX2 | -2.050120433 | 7.392933929 | -15.05083481 | 2.45055E-25 | 8.78587E-23 | 47.23187531 |
| 226142_at | GLIPR1 | 2.046724981 | 6.768927219 | 7.928558299 | 9.54709E-12 | 1.03548E-10 | 16.23355567 |
| 36499_at | CELSR2 | -2.046426569 | 8.179063308 | -10.94391103 | 1.01796E-17 | 3.66406E-16 | 29.85393988 |
| 215692_s_at | MPPED2 | -2.045592963 | 5.515862404 | -9.673646632 | 3.22925E-15 | 6.71839E-14 | 24.14403735 |
| 223922_x_at | MS4A6A | 2.045591412 | 8.51670737 | 8.247513863 | 2.22335E-12 | 2.69002E-11 | 17.67407105 |
| 229560_at | TLR8 | 2.043542358 | 5.717667597 | 6.309211845 | 1.34087E-08 | 8.62799E-08 | 9.092817202 |
| 202746_at | ITM2A | -2.043535981 | 10.03655599 | -9.823627256 | 1.62799E-15 | 3.58624E-14 | 24.82282207 |
| 225481_at | FRMD6 | 2.043283208 | 8.746009366 | 14.40564156 | 3.37544E-24 | 8.38874E-22 | 44.63755362 |
| 223229_at | UBE2T | 2.043181113 | 6.446660614 | 9.099671269 | 4.47173E-14 | 7.52978E-13 | 21.54030856 |
| 205554_s_at | DNASE1L3 | -2.042722523 | 7.30867317 | -9.589607482 | 4.74184E-15 | 9.58093E-14 | 23.76333045 |
| 218711_s_at | SDPR | -2.041240832 | 7.270754166 | -8.981932087 | 7.67306E-14 | 1.22848E-12 | 21.00559846 |
| 52255_s_at | COL5A3 | 2.040418133 | 6.280866483 | 11.35259086 | 1.63685E-18 | 7.14246E-17 | 31.66614413 |
| 210749_x_at | DDR1 /// MIR4640 | -2.040409545 | 9.606984013 | -10.47815156 | 8.30942E-17 | 2.42821E-15 | 27.77213491 |
| 205440_s_at | NPY1R | -2.040245405 | 6.134326956 | -9.294785052 | 1.8284E-14 | 3.33115E-13 | 22.42615893 |
| 209901_x_at | AIF1 | 2.040069733 | 8.557709249 | 9.104908606 | 4.36562E-14 | 7.37382E-13 | 21.56409225 |
| 206299_at | FAM155B | -2.039768989 | 7.156366442 | -12.41365405 | 1.53452E-20 | 1.1669E-18 | 36.29580684 |
| 230031_at | HSPA5 | -2.037731604 | 9.518082587 | -13.48091404 | 1.58652E-22 | 2.21774E-20 | 40.82585314 |
| 239155_at | CXADR | -2.037523015 | 6.340321193 | -9.843045313 | 1.48996E-15 | 3.29678E-14 | 24.91063805 |
| 203108_at | GPRC5A | -2.036806647 | 8.897026442 | -9.00781477 | 6.8142E-14 | 1.10097E-12 | 21.12314778 |
| 227582_at | KLHDC9 | -2.03570493 | 8.504234858 | -13.2087104 | 5.0272E-22 | 5.93655E-20 | 39.68341963 |
| 219666_at | MS4A6A | 2.033750971 | 8.611848387 | 8.055393151 | 5.35143E-12 | 6.06026E-11 | 16.80565773 |
| 222020_s_at | LOC102725271 /// NTM | 2.033376708 | 5.508035925 | 9.371054065 | 1.28926E-14 | 2.41322E-13 | 22.77227506 |
| 225575_at | LIFR | -2.033302258 | 9.53229691 | -10.06057918 | 5.52916E-16 | 1.33942E-14 | 25.89322574 |
| 230230_at | PTPN4 | -2.031955268 | 5.825316805 | -16.15685328 | 3.09127E-27 | 2.0866E-24 | 51.55231157 |
| 203413_at | NELL2 | -2.030073345 | 8.117826798 | -8.625268154 | 3.93917E-13 | 5.50407E-12 | 19.38618699 |
| 226462_at | STXBP6 | -2.028655306 | 6.7157731 | -9.73158967 | 2.4782E-15 | 5.2681E-14 | 24.40638048 |
| 203501_at | CPQ | -2.028189931 | 10.3629116 | -15.07440282 | 2.22889E-25 | 8.12432E-23 | 47.32561379 |
| 213524_s_at | G0S2 | 2.028038225 | 7.828420301 | 6.663926401 | 2.83033E-09 | 2.0255E-08 | 10.62105566 |
| 208779_x_at | DDR1 /// MIR4640 | -2.027520181 | 9.381609363 | -10.2928915 | 1.92378E-16 | 5.1814E-15 | 26.93983585 |
| 225182_at | TMEM50B | -2.027327153 | 10.6656146 | -14.36240104 | 4.03169E-24 | 9.79702E-22 | 44.46175068 |
| 221636_s_at | 2-Mar | -2.026549011 | 7.949965567 | -12.17596298 | 4.32363E-20 | 2.96233E-18 | 35.26897933 |
| 202411_at | IFI27 | 2.026013656 | 8.88242634 | 9.7266583 | 2.53465E-15 | 5.37557E-14 | 24.38405808 |
| 227614_at | HKDC1 | -2.025618321 | 6.685915963 | -12.53785245 | 8.95326E-21 | 7.36119E-19 | 36.82983696 |
| 209357_at | CITED2 | -2.025192494 | 10.50633978 | -12.77658814 | 3.1939E-21 | 3.00562E-19 | 37.85139963 |
| 205353_s_at | PEBP1 | -2.023227087 | 11.53451921 | -15.10459505 | 1.97418E-25 | 7.41573E-23 | 47.4455929 |
| 202803_s_at | ITGB2 | 2.022989105 | 8.121909665 | 6.062164727 | 3.9017E-08 | 2.32229E-07 | 8.04537388 |
| 211367_s_at | CASP1 | 2.022614259 | 5.876956234 | 7.598036393 | 4.29401E-11 | 4.16695E-10 | 14.74851066 |
| 225619_at | SLAIN1 | -2.022035588 | 6.339480624 | -11.82924806 | 1.9805E-19 | 1.0975E-17 | 33.76023871 |
| 244669_at | SNORD50A /// SNORD50B | -2.021700713 | 8.554323201 | -14.28443693 | 5.55728E-24 | 1.28204E-21 | 44.14416263 |
| 207265_s_at | KDELR3 | 2.021090883 | 7.481982241 | 11.36146049 | 1.57346E-18 | 6.89334E-17 | 31.7053099 |
| 204542_at | ST6GALNAC2 | -2.020225972 | 7.539975709 | -10.38786187 | 1.25064E-16 | 3.50661E-15 | 27.36677492 |
| 213679_at | TTC30A | -2.019838839 | 6.612312905 | -12.05816471 | 7.24079E-20 | 4.55884E-18 | 34.75780433 |
| 238567_at | SGPP2 | -2.019522169 | 6.762511182 | -11.35152271 | 1.64466E-18 | 7.1708E-17 | 31.66142698 |
| 206420_at | IGSF6 | 2.017906696 | 5.647864472 | 7.579029112 | 4.68062E-11 | 4.51107E-10 | 14.66340925 |
| 224204_x_at | ARNTL2 | 2.016765041 | 5.756664125 | 11.56925613 | 6.25013E-19 | 3.05658E-17 | 32.6207612 |
| 226018_at | MTURN | -2.015328353 | 6.994722517 | -10.18607288 | 3.12467E-16 | 8.04339E-15 | 26.45897828 |
| 231950_at | ZNF658 | -2.014761771 | 5.926889192 | -11.54802439 | 6.86715E-19 | 3.32483E-17 | 32.52741304 |
| 1557527_at | AX746823 | 2.014164532 | 4.31145866 | 10.9435616 | 1.01956E-17 | 3.66507E-16 | 29.85238431 |
| 222547_at | MAP4K4 | 2.012355165 | 6.574902959 | 9.785220027 | 1.93992E-15 | 4.20726E-14 | 24.64908295 |
| 214071_at | GNAL | -2.011071089 | 5.823326502 | -9.669817938 | 3.28625E-15 | 6.82658E-14 | 24.12669822 |
| 212472_at | MICAL2 | 2.010415322 | 7.044201166 | 12.28599993 | 2.67454E-20 | 1.92412E-18 | 35.74511499 |
| 211941_s_at | PEBP1 | -2.010096963 | 11.86759908 | -15.39787199 | 6.11058E-26 | 2.69432E-23 | 48.60480747 |
| 209765_at | ADAM19 | 2.009788993 | 5.856646455 | 10.31151735 | 1.76789E-16 | 4.80176E-15 | 27.02361257 |
| 228573_at | ANTXR2 | 2.009193492 | 6.550851566 | 10.94355665 | 1.01958E-17 | 3.66507E-16 | 29.85236229 |
| 235458_at | HAVCR2 | 2.007399519 | 6.815686385 | 7.915957009 | 1.01117E-11 | 1.09153E-10 | 16.17677623 |
| 218854_at | DSE | 2.007376286 | 8.307506599 | 12.79153389 | 2.99496E-21 | 2.83303E-19 | 37.91513329 |
| 209956_s_at | CAMK2B | -2.007047205 | 5.345597819 | -14.19101158 | 8.17171E-24 | 1.76596E-21 | 43.76256263 |
| 229724_at | GABRB3 | -2.006003601 | 6.792295714 | -8.48175386 | 7.60547E-13 | 1.00176E-11 | 18.73517657 |
| 229435_at | GLIS3 | -2.005357767 | 9.00421654 | -10.16788836 | 3.39387E-16 | 8.64678E-15 | 26.37705236 |
| 226303_at | PGM5 | -2.005171954 | 7.44573882 | -9.283289782 | 1.92728E-14 | 3.48806E-13 | 22.37398295 |
| 202730_s_at | MIR4680 /// PDCD4 | -2.004902552 | 8.332509108 | -13.47404516 | 1.63319E-22 | 2.26637E-20 | 40.79713679 |
| 1554408_a_at | TK1 | 2.003824899 | 6.613281026 | 10.23405306 | 2.51274E-16 | 6.60502E-15 | 26.67505028 |
| 1556499_s_at | COL1A1 | 2.002929783 | 11.39405821 | 11.87017605 | 1.65376E-19 | 9.36988E-18 | 33.93899379 |
| 229014_at | NR2F1-AS1 | 2.002790341 | 6.206914216 | 12.51799969 | 9.75739E-21 | 7.93877E-19 | 36.74459106 |
| 213566_at | RNASE6 | 2.002552543 | 7.949675042 | 6.269573989 | 1.59296E-08 | 1.00992E-07 | 8.923758225 |
| 226908_at | LRIG3 | -2.001125932 | 8.027821803 | -10.02587375 | 6.47548E-16 | 1.54741E-14 | 25.73661803 |
