# Supplementary material for: [Retracted] Recognition of Key Genes in Human Anaplastic Thyroid Cancer via the Weighing Gene Coexpression Network
Source: Hindawi journal article supplement (doi:10.1155/2022/2244228), 2022-01-01
Supplement: f3 [file 2244228.f3.doc]

| Supplementary Table 3 The cytoHubba Network Analyzer plug-in from Cytoscape software selected top 10 DEGs with the degree and betweenness of which were all more than four-fold of the corresponding median values as the candidate hub genes | | | | | |
| --- | --- | --- | --- | --- | --- |
| Name | Ensembl ID | Degree | Betweenness | Group | Category |
| CXCL8 | ENSG00000170312 | 83 | 19786.29848 | None | Up-regulated gene |
| CDH1 | ENSG00000138160 | 88 | 50112.33612 | None | Down-regulated gene |
| AURKA | ENSG00000100985 | 82 | 6236.57278 | Module 1 | Up-regulated gene |
| CCNA2 | ENSG00000169429 | 80 | 5220.62678 | Module 1 | Up-regulated gene |
| FN1 | ENSG00000039068 | 113 | 48013.86994 | None | Up-regulated gene |
| CDK1 | ENSG00000087586 | 88 | 10874.38054 | Module 1 | Up-regulated gene |
| ITGAM | ENSG00000117399 | 79 | 11040.12744 | Module 2 | Up-regulated gene |
| CDC20 | ENSG00000145386 | 78 | 2943.1131 | Module 1 | Up-regulated gene |
| MMP9 | ENSG00000169896 | 92 | 35217.35589 | None | Up-regulated gene |
| KIF11 | ENSG00000115414 | 79 | 5256.80756 | Module 1 | Up-regulated gene |
