# Supplementary material for: [Retracted] Recognition of Key Genes in Human Anaplastic Thyroid Cancer via the Weighing Gene Coexpression Network
Source: Hindawi journal article supplement (doi:10.1155/2022/2244228), 2022-01-01
Supplement: f4 [file 2244228.f4.doc]

| Supplementary Table 4 Module analysis of PPI network | | | | | | | | | | | | | |
| --- | --- | --- | --- | --- | --- | --- | --- | --- | --- | --- | --- | --- | --- |
| Group | Category | Term | Count | % | PValue | Genes | List Total | Pop Hits | Pop Total | Fold Enrichment | Bonferroni | Benjamini | FDR |
| Module 1 | GOTERM_BP_DIRECT | GO:0007018~microtubule-based movement | 8 | 0.063719634 | 1.25E-08 | KIF14, KIF23, KIF2C, KIF4A, KIF11, KIF15, CENPE, KIF20A | 58 | 62 | 12321 | 27.41045606 | 3.33E-06 | 3.33E-06 | 1.64E-05 |
| Module 1 | GOTERM_BP_DIRECT | GO:0000281~mitotic cytokinesis | 5 | 0.039824771 | 2.32E-06 | KIF23, NUSAP1, ANLN, RACGAP1, KIF20A | 58 | 21 | 12321 | 50.57881773 | 6.18E-04 | 3.09E-04 | 0.003047324 |
| Module 1 | GOTERM_BP_DIRECT | GO:0032467~positive regulation of cytokinesis | 5 | 0.039824771 | 2.83E-06 | KIF14, KIF23, CDC6, RACGAP1, ECT2 | 58 | 22 | 12321 | 48.27978056 | 7.52E-04 | 2.51E-04 | 0.003711692 |
| Module 1 | GOTERM_BP_DIRECT | GO:0007059~chromosome segregation | 5 | 0.039824771 | 4.87E-05 | SPC25, CENPN, KIF11, NEK2, BIRC5 | 58 | 44 | 12321 | 24.13989028 | 0.012866518 | 0.003232267 | 0.063842033 |
| Module 1 | GOTERM_BP_DIRECT | GO:0046602~regulation of mitotic centrosome separation | 3 | 0.023894863 | 1.25E-04 | KIF11, NEK2, CHEK1 | 58 | 4 | 12321 | 159.3232759 | 0.032813522 | 0.006650578 | 0.164397684 |
| Module 1 | GOTERM_BP_DIRECT | GO:0000910~cytokinesis | 4 | 0.031859817 | 1.77E-04 | PRC1, BIRC5, ECT2, KIF20A | 58 | 24 | 12321 | 35.40517241 | 0.046082027 | 0.0078321 | 0.232383885 |
| Module 1 | GOTERM_BP_DIRECT | GO:0090307~mitotic spindle assembly | 4 | 0.031859817 | 2.01E-04 | KIF11, NEK2, TPX2, BIRC5 | 58 | 25 | 12321 | 33.98896552 | 0.052033246 | 0.00760463 | 0.263169727 |
| Module 1 | GOTERM_BP_DIRECT | GO:0051988~regulation of attachment of spindle microtubules to kinetochore | 3 | 0.023894863 | 3.12E-04 | NEK2, RACGAP1, ECT2 | 58 | 6 | 12321 | 106.2155172 | 0.079577267 | 0.010311743 | 0.40809248 |
| Module 1 | GOTERM_BP_DIRECT | GO:0051301~cell division | 4 | 0.031859817 | 0.001237567 | KIF14, CDC6, CKS2, BIRC5 | 58 | 46 | 12321 | 18.47226387 | 0.280642395 | 0.035937961 | 1.611283542 |
| Module 1 | GOTERM_BP_DIRECT | GO:0007094~mitotic spindle assembly checkpoint | 3 | 0.023894863 | 0.001347171 | MAD2L1, BUB1, BUB1B | 58 | 12 | 12321 | 53.10775862 | 0.301338583 | 0.03522359 | 1.752822893 |
| Module 1 | GOTERM_BP_DIRECT | GO:0032147~activation of protein kinase activity | 3 | 0.023894863 | 0.002124211 | KIF14, TPX2, ECT2 | 58 | 15 | 12321 | 42.4862069 | 0.432004183 | 0.050122196 | 2.750890364 |
| Module 1 | GOTERM_BP_DIRECT | GO:0006270~DNA replication initiation | 3 | 0.023894863 | 0.004173479 | CCNE2, CDC6, MCM10 | 58 | 21 | 12321 | 30.34729064 | 0.671253541 | 0.088538301 | 5.338320027 |
| Module 1 | GOTERM_BP_DIRECT | GO:0007052~mitotic spindle organization | 3 | 0.023894863 | 0.004577244 | SPC25, AURKA, NDC80 | 58 | 22 | 12321 | 28.96786834 | 0.704870805 | 0.089601139 | 5.840558599 |
| Module 1 | GOTERM_BP_DIRECT | GO:0000086~G2/M transition of mitotic cell cycle | 3 | 0.023894863 | 0.006364032 | FOXM1, CHEK1, BIRC5 | 58 | 26 | 12321 | 24.51127321 | 0.816995076 | 0.114234482 | 8.033711026 |
| Module 1 | GOTERM_BP_DIRECT | GO:0000915~actomyosin contractile ring assembly | 2 | 0.015929908 | 0.009231467 | KIF23, RACGAP1 | 58 | 2 | 12321 | 212.4310345 | 0.915158868 | 0.151652541 | 11.45487036 |
| Module 1 | GOTERM_BP_DIRECT | GO:0007067~mitotic nuclear division | 3 | 0.023894863 | 0.013963622 | CENPN, NUF2, ASPM | 58 | 39 | 12321 | 16.34084881 | 0.976257776 | 0.208465064 | 16.84477903 |
| Module 1 | GOTERM_BP_DIRECT | GO:0044772~mitotic cell cycle phase transition | 2 | 0.015929908 | 0.018379196 | CDK1, CKS2 | 58 | 4 | 12321 | 106.2155172 | 0.992804872 | 0.251927923 | 21.59915236 |
| Module 1 | GOTERM_BP_DIRECT | GO:0051256~mitotic spindle midzone assembly | 2 | 0.015929908 | 0.018379196 | KIF23, RACGAP1 | 58 | 4 | 12321 | 106.2155172 | 0.992804872 | 0.251927923 | 21.59915236 |
| Module 1 | GOTERM_BP_DIRECT | GO:0007100~mitotic centrosome separation | 2 | 0.015929908 | 0.018379196 | KIF11, AURKA | 58 | 4 | 12321 | 106.2155172 | 0.992804872 | 0.251927923 | 21.59915236 |
| Module 2 | GOTERM_BP_DIRECT | GO:0006954~inflammatory response | 15 | 46.875 | 1.28E-15 | CXCL1, C3AR1, S100A8, CXCL5, HCK, CCR1, S100A9, TLR2, ITGB2, FPR3, TLR8, S1PR3, CCL13, CCL20, CCL21 | 32 | 379 | 16792 | 20.76846966 | 4.05E-13 | 4.05E-13 | 1.79E-12 |
| Module 2 | GOTERM_BP_DIRECT | GO:0006955~immune response | 13 | 40.625 | 4.84E-12 | CXCL1, LILRB2, CCL13, CXCL5, CCL20, CCL21, CCR1, FCGR1A, TLR2, FCGR3A, FCGR3B, CCL28, LCP2 | 32 | 421 | 16792 | 16.20368171 | 1.47E-09 | 7.36E-10 | 6.48E-09 |
| Module 2 | GOTERM_BP_DIRECT | GO:0060326~cell chemotaxis | 8 | 25 | 2.28E-11 | CXCL1, C3AR1, CCL13, CXCL5, CCL20, CCL21, FPR3, CCL28 | 32 | 65 | 16792 | 64.58461538 | 6.94E-09 | 2.31E-09 | 3.06E-08 |
| Module 2 | GOTERM_BP_DIRECT | GO:0007267~cell-cell signaling | 9 | 28.125 | 1.43E-08 | C1QA, LILRB2, CCL13, CXCL5, CCL20, CCL21, CCR1, S100A9, ITGB2 | 32 | 254 | 16792 | 18.59350394 | 4.36E-06 | 1.09E-06 | 1.92E-05 |
| Module 2 | GOTERM_BP_DIRECT | GO:0006935~chemotaxis | 7 | 21.875 | 8.25E-08 | CXCL1, C3AR1, CCL13, CXCL5, CCL20, CCR1, CCL28 | 32 | 122 | 16792 | 30.10860656 | 2.51E-05 | 5.01E-06 | 1.10E-04 |
| Module 2 | GOTERM_BP_DIRECT | GO:0030593~neutrophil chemotaxis | 6 | 18.75 | 1.26E-07 | CCL13, S100A8, CCL20, S100A9, FCER1G, ITGB2 | 32 | 66 | 16792 | 47.70454545 | 3.84E-05 | 6.39E-06 | 1.69E-04 |
| Module 2 | GOTERM_BP_DIRECT | GO:0070098~chemokine-mediated signaling pathway | 6 | 18.75 | 1.83E-07 | CXCL1, CCL13, CXCL5, CCL20, CCL21, CCR1 | 32 | 71 | 16792 | 44.34507042 | 5.55E-05 | 7.93E-06 | 2.45E-04 |
| Module 2 | GOTERM_BP_DIRECT | GO:0045087~innate immune response | 9 | 28.125 | 8.15E-07 | C1QA, C1QB, S100A8, NCF2, S100A9, TLR2, FCER1G, TLR8, TYROBP | 32 | 430 | 16792 | 10.98313953 | 2.48E-04 | 3.10E-05 | 0.001090991 |
| Module 2 | GOTERM_BP_DIRECT | GO:0050776~regulation of immune response | 6 | 18.75 | 1.72E-05 | LILRB2, CD300A, FCGR1A, ITGB2, FCGR3A, TYROBP | 32 | 178 | 16792 | 17.68820225 | 0.005212641 | 5.81E-04 | 0.023017042 |
| Module 2 | GOTERM_BP_DIRECT | GO:0007165~signal transduction | 11 | 34.375 | 2.78E-05 | CXCL1, LILRB2, CCL13, CXCL5, CCL20, CD300A, FCGR1A, S100A9, TLR2, FPR3, TYROBP | 32 | 1161 | 16792 | 4.971791559 | 0.008426272 | 8.46E-04 | 0.037264736 |
| Module 2 | GOTERM_BP_DIRECT | GO:0007229~integrin-mediated signaling pathway | 5 | 15.625 | 3.16E-05 | HCK, FCER1G, ITGB2, ITGAM, TYROBP | 32 | 99 | 16792 | 26.50252525 | 0.00957556 | 8.74E-04 | 0.042370841 |
| Module 2 | GOTERM_BP_DIRECT | GO:0050900~leukocyte migration | 5 | 15.625 | 7.17E-05 | C3AR1, FCER1G, FPR3, ITGB2, ITGAM | 32 | 122 | 16792 | 21.50614754 | 0.021560182 | 0.001814685 | 0.095956767 |
| Module 2 | GOTERM_BP_DIRECT | GO:0007204~positive regulation of cytosolic calcium ion concentration | 5 | 15.625 | 1.03E-04 | S1PR3, C3AR1, CCR1, FPR3, CCL28 | 32 | 134 | 16792 | 19.58022388 | 0.030889527 | 0.002410679 | 0.138106469 |
| Module 2 | GOTERM_BP_DIRECT | GO:0002523~leukocyte migration involved in inflammatory response | 3 | 9.375 | 1.80E-04 | S100A8, S100A9, ITGB2 | 32 | 11 | 16792 | 143.1136364 | 0.053122501 | 0.003891377 | 0.240139175 |
| Module 2 | GOTERM_BP_DIRECT | GO:0006968~cellular defense response | 4 | 12.5 | 2.00E-04 | LILRB2, NCF2, MNDA, TYROBP | 32 | 62 | 16792 | 33.85483871 | 0.059034709 | 0.004048385 | 0.26765728 |
| Module 2 | GOTERM_BP_DIRECT | GO:0050729~positive regulation of inflammatory response | 4 | 12.5 | 3.25E-04 | CCL13, S100A8, S100A9, TLR2 | 32 | 73 | 16792 | 28.75342466 | 0.09399365 | 0.006150319 | 0.433830549 |
| Module 2 | GOTERM_BP_DIRECT | GO:0090023~positive regulation of neutrophil chemotaxis | 3 | 9.375 | 7.45E-04 | CXCL1, C3AR1, CCL21 | 32 | 22 | 16792 | 71.55681818 | 0.202632911 | 0.013231688 | 0.992422691 |
| Module 2 | GOTERM_BP_DIRECT | GO:0001816~cytokine production | 3 | 9.375 | 9.64E-04 | S1PR3, S100A8, S100A9 | 32 | 25 | 16792 | 62.97 | 0.254050688 | 0.016151347 | 1.282682845 |
| Module 2 | GOTERM_BP_DIRECT | GO:0048247~lymphocyte chemotaxis | 3 | 9.375 | 0.001210048 | CCL13, CCL20, CCL21 | 32 | 28 | 16792 | 56.22321429 | 0.307936237 | 0.019186043 | 1.60816454 |
| Module 2 | GOTERM_BP_DIRECT | GO:0038096~Fc-gamma receptor signaling pathway involved in phagocytosis | 4 | 12.5 | 0.001626813 | FCGR1A, HCK, FCGR2A, FCGR3A | 32 | 127 | 16792 | 16.52755906 | 0.390400986 | 0.024443981 | 2.156486088 |
| Module 3 | GOTERM_BP_DIRECT | GO:0030199~collagen fibril organization | 6 | 0.204708291 | 3.93E-11 | COL3A1, COL1A2, COL1A1, COL5A2, COL11A1, COL5A1 | 13 | 29 | 12321 | 196.0901857 | 2.71E-09 | 2.71E-09 | 4.06E-08 |
| Module 3 | GOTERM_BP_DIRECT | GO:0071230~cellular response to amino acid stimulus | 5 | 0.170590242 | 4.63E-08 | COL3A1, COL1A2, COL6A1, COL1A1, COL5A2 | 13 | 40 | 12321 | 118.4711538 | 3.19E-06 | 1.60E-06 | 4.77E-05 |
| Module 3 | GOTERM_BP_DIRECT | GO:0070208~protein heterotrimerization | 3 | 0.102354145 | 2.43E-05 | COL1A2, COL6A1, COL1A1 | 13 | 8 | 12321 | 355.4134615 | 0.00167323 | 5.58E-04 | 0.025040285 |
| Module 3 | GOTERM_BP_DIRECT | GO:0035987~endodermal cell differentiation | 3 | 0.102354145 | 2.58E-04 | COL6A1, COL12A1, COL11A1 | 13 | 25 | 12321 | 113.7323077 | 0.017623075 | 0.004435188 | 0.265542568 |
| Module 3 | GOTERM_BP_DIRECT | GO:0001568~blood vessel development | 3 | 0.102354145 | 3.73E-04 | COL1A2, COL1A1, COL5A1 | 13 | 30 | 12321 | 94.77692308 | 0.025385344 | 0.004276349 | 0.38379066 |
| Module 3 | GOTERM_BP_DIRECT | GO:0007160~cell-matrix adhesion | 3 | 0.102354145 | 0.001394529 | COL13A1, COL3A1, COL5A3 | 13 | 58 | 12321 | 49.02254642 | 0.091799106 | 0.013661491 | 1.429654613 |
| Module 3 | GOTERM_BP_DIRECT | GO:0035989~tendon development | 2 | 0.068236097 | 0.001947024 | COL11A1, COL5A1 | 13 | 2 | 12321 | 947.7692308 | 0.125825817 | 0.016668963 | 1.990941605 |
| Module 3 | GOTERM_BP_DIRECT | GO:1903225~negative regulation of endodermal cell differentiation | 2 | 0.068236097 | 0.001947024 | COL5A2, COL5A1 | 13 | 2 | 12321 | 947.7692308 | 0.125825817 | 0.016668963 | 1.990941605 |
| Module 3 | GOTERM_BP_DIRECT | GO:0048592~eye morphogenesis | 2 | 0.068236097 | 0.002919233 | COL5A2, COL5A1 | 13 | 3 | 12321 | 631.8461538 | 0.182677589 | 0.022164198 | 2.971617133 |
| Module 3 | GOTERM_BP_DIRECT | GO:0032964~collagen biosynthetic process | 2 | 0.068236097 | 0.003890573 | COL1A1, COL5A1 | 13 | 4 | 12321 | 473.8846154 | 0.23583619 | 0.026538799 | 3.942558512 |
| Module 3 | GOTERM_BP_DIRECT | GO:0043589~skin morphogenesis | 2 | 0.068236097 | 0.006799392 | COL1A2, COL1A1 | 13 | 7 | 12321 | 270.7912088 | 0.37547273 | 0.041893549 | 6.797931502 |
| Module 3 | GOTERM_BP_DIRECT | GO:0043206~extracellular fibril organization | 2 | 0.068236097 | 0.006799392 | COL3A1, COL5A1 | 13 | 7 | 12321 | 270.7912088 | 0.37547273 | 0.041893549 | 6.797931502 |
| Module 3 | GOTERM_BP_DIRECT | GO:0032836~glomerular basement membrane development | 2 | 0.068236097 | 0.006799392 | COL4A4, COL4A3 | 13 | 7 | 12321 | 270.7912088 | 0.37547273 | 0.041893549 | 6.797931502 |
| Module 3 | GOTERM_BP_DIRECT | GO:0001958~endochondral ossification | 2 | 0.068236097 | 0.021227039 | COL13A1, COL1A1 | 13 | 22 | 12321 | 86.16083916 | 0.772461198 | 0.116063049 | 19.85982601 |
| Module 3 | GOTERM_BP_DIRECT | GO:0001501~skeletal system development | 2 | 0.068236097 | 0.045780658 | COL1A2, COL5A2 | 13 | 48 | 12321 | 39.49038462 | 0.96057907 | 0.220207615 | 38.34096682 |
| Module 3 | GOTERM_BP_DIRECT | GO:0007179~transforming growth factor beta receptor signaling pathway | 2 | 0.068236097 | 0.048577131 | COL3A1, COL1A2 | 13 | 51 | 12321 | 37.16742081 | 0.967805814 | 0.217629125 | 40.18029934 |
