# Supplementary material for: [Retracted] Recognition of Key Genes in Human Anaplastic Thyroid Cancer via the Weighing Gene Coexpression Network
Source: Hindawi journal article supplement (doi:10.1155/2022/2244228), 2022-01-01
Supplement: f5 [file 2244228.f5.doc]

| Supplementary Table 5 Signal paths of KEGG pathway enrichment analysis module 1, module 2 and module 3 | | | | | | | | |
| --- | --- | --- | --- | --- | --- | --- | --- | --- |
| Group | ID | Description | BgRatio | pvalue | p.adjust | qvalue | geneID | Count |
| Module 1 | hsa04110 | Cell cycle | 124/8016 | 8.19E-14 | 3.20E-12 | 2.16E-12 | 990/890/9133/699/991/9134/4085/701/983/7272/1111 | 11 |
| Module 1 | hsa04115 | p53 signaling pathway | 72/8016 | 1.08E-07 | 1.99E-06 | 1.34E-06 | 9133/51512/9134/983/6241/1111 | 6 |
| Module 1 | hsa04114 | Oocyte meiosis | 128/8016 | 1.53E-07 | 1.99E-06 | 1.34E-06 | 9133/699/991/9134/4085/6790/983 | 7 |
| Module 1 | hsa04914 | Progesterone-mediated oocyte maturation | 99/8016 | 7.31E-07 | 7.13E-06 | 4.81E-06 | 890/9133/699/4085/6790/983 | 6 |
| Module 1 | hsa05166 | Human T-cell leukemia virus 1 infection | 219/8016 | 5.75E-06 | 4.49E-05 | 3.03E-05 | 890/9133/991/9134/4085/701/1111 | 7 |
| Module 1 | hsa04218 | Cellular senescence | 160/8016 | 1.20E-05 | 7.83E-05 | 5.28E-05 | 890/9133/9134/2305/983/1111 | 6 |
| Module 1 | hsa05203 | Viral carcinogenesis | 201/8016 | 0.000485558 | 0.002705252 | 0.001825406 | 890/991/9134/983/1111 | 5 |
| Module 1 | hsa00240 | Pyrimidine metabolism | 57/8016 | 0.000883434 | 0.00430674 | 0.002906032 | 7083/7298/6241 | 3 |
| Module 2 | hsa04062 | Chemokine signaling pathway | 189/8016 | 3.09E-07 | 2.83E-06 | 1.58E-06 | 6364/1230/6366/3055/6357/2919/6374/56477 | 8 |
| Module 2 | hsa04650 | Natural killer cell mediated cytotoxicity | 131/8016 | 7.31E-06 | 5.10E-05 | 2.85E-05 | 3937/2207/2214/2215/3689/7305 | 6 |
| Module 2 | hsa04610 | Complement and coagulation cascades | 85/8016 | 1.38E-05 | 8.01E-05 | 4.48E-05 | 719/3689/3684/713/712 | 5 |
| Module 2 | hsa04657 | IL-17 signaling pathway | 94/8016 | 2.25E-05 | 0.000102928 | 5.76E-05 | 6364/6279/6280/2919/6374 | 5 |
| Module 2 | hsa04060 | Cytokine-cytokine receptor interaction | 294/8016 | 8.18E-05 | 0.000327119 | 0.000182929 | 6364/1230/6366/6357/2919/6374/56477 | 7 |
| Module 2 | hsa04064 | NF-kappa B signaling pathway | 102/8016 | 0.006329093 | 0.021319049 | 0.011921836 | 6366/6357/2919 | 3 |
| Module 2 | hsa04668 | TNF signaling pathway | 112/8016 | 0.008193183 | 0.022798424 | 0.012749118 | 6364/2919/6374 | 3 |
| Module 2 | hsa04670 | Leukocyte transendothelial migration | 112/8016 | 0.008193183 | 0.022798424 | 0.012749118 | 4688/3689/3684 | 3 |
| Module 2 | hsa04611 | Platelet activation | 124/8016 | 0.010817756 | 0.027693455 | 0.015486472 | 3937/2207/2212 | 3 |
| Module 3 | hsa04974 | Protein digestion and absorption | 95/8016 | 3.98E-34 | 4.38E-33 | 4.19E-34 | 1277/1303/1278/1301/1285/1286/7373/1289/1281/1293/1305/1290/1300/1292/1291/1299/50509 | 17 |
| Module 3 | hsa04512 | ECM-receptor interaction | 88/8016 | 3.42E-12 | 1.88E-11 | 1.80E-12 | 1277/1278/1285/1286/1293/1292/1291/1299 | 8 |
| Module 3 | hsa04510 | Focal adhesion | 199/8016 | 2.52E-09 | 9.23E-09 | 8.83E-10 | 1277/1278/1285/1286/1293/1292/1291/1299 | 8 |
| Module 3 | hsa04151 | PI3K-Akt signaling pathway | 354/8016 | 2.29E-07 | 5.04E-07 | 4.83E-08 | 1277/1278/1285/1286/1293/1292/1291/1299 | 8 |
| Module 3 | hsa04933 | AGE-RAGE signaling pathway in diabetic complications | 100/8016 | 1.50E-06 | 2.60E-06 | 2.49E-07 | 1277/1278/1285/1286/1281 | 5 |
| Module 3 | hsa04926 | Relaxin signaling pathway | 129/8016 | 5.29E-06 | 7.28E-06 | 6.96E-07 | 1277/1278/1285/1286/1281 | 5 |
| Module 3 | hsa04611 | Platelet activation | 124/8016 | 0.002096705 | 0.00256264 | 0.000245229 | 1277/1278/1281 | 3 |
